# Supplementary material
Source: PubMed Central journal article supplement (PMC2718374)
Supplement: 0905620106_ST1_PDF.pdf [file 0905620106_ST1_PDF.pdf]

Table S1.

| Site reference number<br>(database) | Site name        | Global seagrass bioregion | Country | Year study started | Year study ended | Area category | Specific rate of change, $\mu$<br>(% $y^{-1}$ ) | Year of data record | Area recorded (Ha) | Data source (publication number*) |
|-------------------------------------|------------------|---------------------------|---------|--------------------|------------------|---------------|-------------------------------------------------|---------------------|--------------------|-----------------------------------|
| 1                                   | Chincoteague Bay | Temperate North Atlantic  | USA     | 1986               | 2003             | >1000ha       | 6.39                                            | 1986                | 2100               | [1]                               |
|                                     |                  |                           |         |                    |                  |               |                                                 | 1987                | 2300               |                                   |
|                                     |                  |                           |         |                    |                  |               |                                                 | 1989                | 2200               |                                   |
|                                     |                  |                           |         |                    |                  |               |                                                 | 1990                | 2300               |                                   |
|                                     |                  |                           |         |                    |                  |               |                                                 | 1991                | 2600               |                                   |
|                                     |                  |                           |         |                    |                  |               |                                                 | 1992                | 3200               |                                   |
|                                     |                  |                           |         |                    |                  |               |                                                 | 1993                | 3400               |                                   |
|                                     |                  |                           |         |                    |                  |               |                                                 | 1994                | 3700               |                                   |
|                                     |                  |                           |         |                    |                  |               |                                                 | 1995                | 3400               |                                   |
|                                     |                  |                           |         |                    |                  |               |                                                 | 1996                | 4000               |                                   |
|                                     |                  |                           |         |                    |                  |               |                                                 | 1997                | 5000               |                                   |
|                                     |                  |                           |         |                    |                  |               |                                                 | 1998                | 5500               |                                   |
|                                     |                  |                           |         |                    |                  |               |                                                 | 1999                | 6300               |                                   |
|                                     |                  |                           |         |                    |                  |               |                                                 | 2000                | 6900               |                                   |
| 2001                                | 6794             |                           |         |                    |                  |               |                                                 |                     |                    |                                   |
| 2002                                | 6300             |                           |         |                    |                  |               |                                                 |                     |                    |                                   |
| 2003                                | 6220             |                           |         |                    |                  |               |                                                 |                     |                    |                                   |
| 2                                   | Sinepuxent Bay   | Temperate North Atlantic  | USA     | 1986               | 2003             | <1000ha       | 18.69                                           | 1986                | 29                 | [1]                               |
|                                     |                  |                           |         |                    |                  |               |                                                 | 1987                | 75                 |                                   |
|                                     |                  |                           |         |                    |                  |               |                                                 | 1989                | 132                |                                   |
|                                     |                  |                           |         |                    |                  |               |                                                 | 1990                | 180                |                                   |
|                                     |                  |                           |         |                    |                  |               |                                                 | 1991                | 180                |                                   |
|                                     |                  |                           |         |                    |                  |               |                                                 | 1992                | 200                |                                   |
|                                     |                  |                           |         |                    |                  |               |                                                 | 1993                | 230                |                                   |
|                                     |                  |                           |         |                    |                  |               |                                                 | 1994                | 280                |                                   |
|                                     |                  |                           |         |                    |                  |               |                                                 | 1995                | 230                |                                   |
|                                     |                  |                           |         |                    |                  |               |                                                 | 1996                | 350                |                                   |
|                                     |                  |                           |         |                    |                  |               |                                                 | 1997                | 420                |                                   |
| 1998                                | 480              |                           |         |                    |                  |               |                                                 |                     |                    |                                   |

| Site reference number<br>(database) | Site name                      | Global seagrass bioregion | Country | Year study started | Year study ended | Area category | Specific rate of change, $\mu$<br>(% $y^{-1}$ ) | Year of data record | Area recorded<br>(Ha) | Data source<br>(publication number*) |
|-------------------------------------|--------------------------------|---------------------------|---------|--------------------|------------------|---------------|-------------------------------------------------|---------------------|-----------------------|--------------------------------------|
|                                     |                                |                           |         |                    |                  |               |                                                 | 1999                | 650                   |                                      |
|                                     |                                |                           |         |                    |                  |               |                                                 | 2000                | 690                   |                                      |
|                                     |                                |                           |         |                    |                  |               |                                                 | 2001                | 680                   |                                      |
|                                     |                                |                           |         |                    |                  |               |                                                 | 2002                | 743                   |                                      |
|                                     |                                |                           |         |                    |                  |               |                                                 | 2003                | 696                   |                                      |
| 4                                   | Southern Delmarva Coastal Bays | Temperate North Atlantic  | USA     | 2001               | 2003             | <100ha        | 103.34                                          | 2001                | 20                    | [1]                                  |
|                                     |                                |                           |         |                    |                  |               |                                                 | 2002                | 85                    |                                      |
|                                     |                                |                           |         |                    |                  |               |                                                 | 2003                | 158                   |                                      |
| 5                                   | Tampa Bay                      | Tropical Atlantic         | USA     | 1879               | 2006             | >1000ha       | -0.78                                           | 1879                | 30970                 | [2]                                  |
|                                     |                                |                           |         |                    |                  |               |                                                 | 1950                | 16448                 |                                      |
|                                     |                                |                           |         |                    |                  |               |                                                 | 1982                | 8764                  |                                      |
|                                     |                                |                           |         |                    |                  |               |                                                 | 1988                | 9427                  |                                      |
|                                     |                                |                           |         |                    |                  |               |                                                 | 1990                | 10213                 |                                      |
|                                     |                                |                           |         |                    |                  |               |                                                 | 1992                | 10426                 |                                      |
|                                     |                                |                           |         |                    |                  |               |                                                 | 1994                | 10736                 |                                      |
|                                     |                                |                           |         |                    |                  |               |                                                 | 1996                | 10897                 |                                      |
|                                     |                                |                           |         |                    |                  |               |                                                 | 1999                | 10057                 |                                      |
|                                     |                                |                           |         |                    |                  |               |                                                 | 2002                | 10558                 |                                      |
|                                     |                                |                           |         |                    |                  |               |                                                 | 2004                | 10941                 |                                      |
|                                     |                                |                           |         |                    |                  |               |                                                 | 2006                | 11466                 |                                      |
| 6                                   | Upper Charlotte Harbor         | Tropical Atlantic         | USA     | 1982               | 2002             | >1000ha       | 0.01                                            | 1982                | 7369                  | [2]                                  |
|                                     |                                |                           |         |                    |                  |               |                                                 | 1988                | 7507                  |                                      |
|                                     |                                |                           |         |                    |                  |               |                                                 | 1992                | 7216                  |                                      |
|                                     |                                |                           |         |                    |                  |               |                                                 | 1993                | 7532                  |                                      |
|                                     |                                |                           |         |                    |                  |               |                                                 | 1996                | 7781                  |                                      |
|                                     |                                |                           |         |                    |                  |               |                                                 | 1999                | 7224                  |                                      |
|                                     |                                |                           |         |                    |                  |               |                                                 | 2002                | 7381                  |                                      |
| 7                                   | Sarasota Bay                   | Tropical Atlantic         | USA     | 1950               | 2001             | >1000ha       | -0.56                                           | 1950                | 4886                  | [2]                                  |
|                                     |                                |                           |         |                    |                  |               |                                                 | 1987                | 3476                  |                                      |

| Site reference number<br>(database) | Site name   | Global seagrass bioregion | Country | Year study started | Year study ended | Area category | Specific rate of change, $\mu$<br>(% $y^{-1}$ ) | Year of data record | Area recorded<br>(Ha) | Data source<br>(publication number*) |
|-------------------------------------|-------------|---------------------------|---------|--------------------|------------------|---------------|-------------------------------------------------|---------------------|-----------------------|--------------------------------------|
|                                     |             |                           |         |                    |                  |               |                                                 | 1993                | 3865                  |                                      |
|                                     |             |                           |         |                    |                  |               |                                                 | 1995                | 4158                  |                                      |
|                                     |             |                           |         |                    |                  |               |                                                 | 1998                | 3701                  |                                      |
|                                     |             |                           |         |                    |                  |               |                                                 | 2001                | 3668                  |                                      |
| <b>15</b>                           | Cala Millo  | Mediterranean             | Spain   | 1956               | 2001             | <1000ha       | -1.68                                           | 1956                | 259.4                 | [3]                                  |
|                                     |             |                           |         |                    |                  |               |                                                 | 2001                | 121.7                 |                                      |
| <b>16</b>                           | Calvia      | Mediterranean             | Spain   | 1956               | 2001             | <1000ha       | -0.85                                           | 1956                | 313.1                 | [3]                                  |
|                                     |             |                           |         |                    |                  |               |                                                 | 2001                | 213.7                 |                                      |
| <b>17</b>                           | Maquoit Bay | Temperate North Atlantic  | USA     | 1993               | 2001             | <1000ha       | 5.30                                            | 1993                | 373.2                 | [4]                                  |
|                                     |             |                           |         |                    |                  |               |                                                 | 2000                | 535.5                 |                                      |
|                                     |             |                           |         |                    |                  |               |                                                 | 2001                | 570.1                 |                                      |
| <b>18</b>                           | Holmstange  | Temperate North Atlantic  | Denmark | 1945               | 1995             | <10ha         | 7.63                                            | 1945                | 0.3601                | [5]                                  |
|                                     |             |                           |         |                    |                  |               |                                                 | 1954                | 1.1287                |                                      |
|                                     |             |                           |         |                    |                  |               |                                                 | 1959                | 9.718                 |                                      |
|                                     |             |                           |         |                    |                  |               |                                                 | 1974                | 10.098                |                                      |
|                                     |             |                           |         |                    |                  |               |                                                 | 1981                | 7.4888                |                                      |
|                                     |             |                           |         |                    |                  |               |                                                 | 1986                | 4.2047                |                                      |
|                                     |             |                           |         |                    |                  |               |                                                 | 1992                | 13.8553               |                                      |
|                                     |             |                           |         |                    |                  |               |                                                 | 1995                | 16.3639               |                                      |
| <b>19</b>                           | Boddum Vig  | Temperate North Atlantic  | Denmark | 1954               | 1998             | <100ha        | 3.90                                            | 1954                | 3.0671                | [5]                                  |
|                                     |             |                           |         |                    |                  |               |                                                 | 1958                | 5.0023                |                                      |
|                                     |             |                           |         |                    |                  |               |                                                 | 1975                | 11.7847               |                                      |
|                                     |             |                           |         |                    |                  |               |                                                 | 1981                | 6.7919                |                                      |
|                                     |             |                           |         |                    |                  |               |                                                 | 1986                | 9.3079                |                                      |
|                                     |             |                           |         |                    |                  |               |                                                 | 1992                | 28.5837               |                                      |
|                                     |             |                           |         |                    |                  |               |                                                 | 1995                | 20.5012               |                                      |
|                                     |             |                           |         |                    |                  |               |                                                 | 1998                | 17.0408               |                                      |
| <b>20</b>                           | Vejie       | Temperate North Atlantic  | Denmark | 1954               | 1999             | <10ha         | 2.99                                            | 1954                | 1.2873                | [5]                                  |
|                                     |             |                           |         |                    |                  |               |                                                 | 1960                | 1.6972                |                                      |
|                                     |             |                           |         |                    |                  |               |                                                 | 1970                | 4.9942                |                                      |

| Site reference number<br>(database) | Site name            | Global seagrass bioregion | Country         | Year study started | Year study ended | Area category | Specific rate of change, $\mu$<br>(% $y^{-1}$ ) | Year of data record | Area recorded<br>(Ha) | Data source<br>(publication number*) |
|-------------------------------------|----------------------|---------------------------|-----------------|--------------------|------------------|---------------|-------------------------------------------------|---------------------|-----------------------|--------------------------------------|
|                                     |                      |                           |                 |                    |                  |               |                                                 | 1977                | 5.2349                |                                      |
|                                     |                      |                           |                 |                    |                  |               |                                                 | 1983                | 5.1017                |                                      |
|                                     |                      |                           |                 |                    |                  |               |                                                 | 1995                | 3.2058                |                                      |
|                                     |                      |                           |                 |                    |                  |               |                                                 | 1999                | 4.9388                |                                      |
| <b>21</b>                           | Amager               | Temperate North Atlantic  | Denmark         | 1954               | 1995             | <1000ha       | -0.98                                           | 1954                | 138.6405              | [5]                                  |
|                                     |                      |                           |                 |                    |                  |               |                                                 | 1967                | 156.8419              |                                      |
|                                     |                      |                           |                 |                    |                  |               |                                                 | 1974                | 71.6146               |                                      |
|                                     |                      |                           |                 |                    |                  |               |                                                 | 1980                | 117.2306              |                                      |
|                                     |                      |                           |                 |                    |                  |               |                                                 | 1984                | 108.0853              |                                      |
|                                     |                      |                           |                 |                    |                  |               |                                                 | 1989                | 138.4917              |                                      |
|                                     |                      |                           |                 |                    |                  |               |                                                 | 1995                | 92.8247               |                                      |
| <b>22</b>                           | Samsø                | Temperate North Atlantic  | Denmark         | 1954               | 1999             | <1000ha       | -1.16                                           | 1954                | 147.3958              | [5]                                  |
|                                     |                      |                           |                 |                    |                  |               |                                                 | 1969                | 119.3412              |                                      |
|                                     |                      |                           |                 |                    |                  |               |                                                 | 1975                | 115.4546              |                                      |
|                                     |                      |                           |                 |                    |                  |               |                                                 | 1979                | 90.3404               |                                      |
|                                     |                      |                           |                 |                    |                  |               |                                                 | 1983                | 141.4856              |                                      |
|                                     |                      |                           |                 |                    |                  |               |                                                 | 1988                | 146.2929              |                                      |
|                                     |                      |                           |                 |                    |                  |               |                                                 | 1993                | 67.1163               |                                      |
|                                     |                      |                           |                 |                    |                  |               |                                                 | 1994                | 76.7664               |                                      |
|                                     |                      |                           |                 |                    |                  |               |                                                 | 1995                | 81.5879               |                                      |
|                                     |                      |                           |                 |                    |                  |               |                                                 | 1999                | 87.3645               |                                      |
| <b>23</b>                           | Terschelling harbour | Temperate North Atlantic  | The Netherlands | 1995               | 1998             | <100ha        | -82.31                                          | 1995                | 18.9                  | [6]                                  |
|                                     |                      |                           |                 |                    |                  |               |                                                 | 1998                | 1.6                   |                                      |
| <b>24</b>                           | Paap                 | Temperate North Atlantic  | The Netherlands | 1994               | 1997             | <100ha        | 48.01                                           | 1994                | 27                    | [6]                                  |
|                                     |                      |                           |                 |                    |                  |               |                                                 | 1995                | 64                    |                                      |
|                                     |                      |                           |                 |                    |                  |               |                                                 | 1996                | 159                   |                                      |
|                                     |                      |                           |                 |                    |                  |               |                                                 | 1997                | 114                   |                                      |
| <b>25</b>                           | Stromstad            | Temperate North Atlantic  | Sweden          | 1980               | 2000             | <1000ha       | -2.87                                           | 1980                | 190                   | [7]                                  |
|                                     |                      |                           |                 |                    |                  |               |                                                 | 2000                | 107                   |                                      |

| Site reference number<br>(database) | Site name        | Global seagrass bioregion | Country | Year study started | Year study ended | Area category | Specific rate of change, $\mu$<br>(% $y^{-1}$ ) | Year of data record | Area recorded<br>(Ha) | Data source<br>(publication number*) |
|-------------------------------------|------------------|---------------------------|---------|--------------------|------------------|---------------|-------------------------------------------------|---------------------|-----------------------|--------------------------------------|
| 26                                  | Lysekil          | Temperate North Atlantic  | Sweden  | 1980               | 2000             | <1000ha       | -0.12                                           | 1980                | 167                   | [7]                                  |
|                                     |                  |                           |         |                    |                  |               |                                                 | 2000                | 163                   |                                      |
| 27                                  | Uddevalla        | Temperate North Atlantic  | Sweden  | 1980               | 2000             | <1000ha       | -6.53                                           | 1980                | 384                   | [7]                                  |
|                                     |                  |                           |         |                    |                  |               |                                                 | 2000                | 104                   |                                      |
| 28                                  | Stenungsund      | Temperate North Atlantic  | Sweden  | 1980               | 2000             | <1000ha       | -1.03                                           | 1980                | 290                   | [7]                                  |
|                                     |                  |                           |         |                    |                  |               |                                                 | 2000                | 236                   |                                      |
| 29                                  | Kungälv          | Temperate North Atlantic  | Sweden  | 1980               | 2000             | <1000ha       | -8.47                                           | 1980                | 794                   | [7]                                  |
|                                     |                  |                           |         |                    |                  |               |                                                 | 2000                | 146                   |                                      |
| 31                                  | Hillsborough Bay | Tropical Atlantic         | USA     | 1987               | 1990             | <1ha          | 120.48                                          | 1987                | 0.00112885            | [8]                                  |
|                                     |                  |                           |         |                    |                  |               |                                                 | 1987                | 0.00034993            |                                      |
|                                     |                  |                           |         |                    |                  |               |                                                 | 1987                | 0.00116875            |                                      |
|                                     |                  |                           |         |                    |                  |               |                                                 | 1988                | 0.00024182            |                                      |
|                                     |                  |                           |         |                    |                  |               |                                                 | 1988                | 0.00776219            |                                      |
|                                     |                  |                           |         |                    |                  |               |                                                 | 1988                | 0.01484461            |                                      |
|                                     |                  |                           |         |                    |                  |               |                                                 | 1989                | 0.01828509            |                                      |
|                                     |                  |                           |         |                    |                  |               |                                                 | 1989                | 0.02929817            |                                      |
| 32                                  | Middle Tampa Bay | Tropical Atlantic         | USA     | 1986               | 1989             | <100ha        | 23.79                                           | 1986                | 48                    | [8]                                  |
|                                     |                  |                           |         |                    |                  |               |                                                 | 1989                | 98                    |                                      |
| 38                                  | Vaccares Lagoon  | Mediterranean             | France  | 1993               | 2003             | >1000ha       | -1.89                                           | 1993                | 4721.61               | [9]                                  |
|                                     |                  |                           |         |                    |                  |               |                                                 | 1994                | 3851.47               |                                      |

| Site reference number<br>(database) | Site name                      | Global seagrass bioregion   | Country   | Year study started | Year study ended | Area category | Specific rate of change, $\mu$<br>(% $y^{-1}$ ) | Year of data record | Area recorded<br>(Ha) | Data source<br>(publication number*) |
|-------------------------------------|--------------------------------|-----------------------------|-----------|--------------------|------------------|---------------|-------------------------------------------------|---------------------|-----------------------|--------------------------------------|
|                                     |                                |                             |           |                    |                  |               |                                                 | 1995                | 3826.11               |                                      |
|                                     |                                |                             |           |                    |                  |               |                                                 | 1996                | 3541.93               |                                      |
|                                     |                                |                             |           |                    |                  |               |                                                 | 1997                | 96.85                 |                                      |
|                                     |                                |                             |           |                    |                  |               |                                                 | 1998                | 1583.78               |                                      |
|                                     |                                |                             |           |                    |                  |               |                                                 | 1999                | 1599.23               |                                      |
|                                     |                                |                             |           |                    |                  |               |                                                 | 2000                | 2963.57               |                                      |
|                                     |                                |                             |           |                    |                  |               |                                                 | 2001                | 4109.8                |                                      |
|                                     |                                |                             |           |                    |                  |               |                                                 | 2002                | 3975.45               |                                      |
|                                     |                                |                             |           |                    |                  |               |                                                 | 2003                | 3909.16               |                                      |
| <b>39</b>                           | Mondego Estuary<br>(South Arm) | Temperate<br>North Atlantic | Portugal  | 1986               | 2002             | <10ha         | -13.99                                          | 1986                | 15                    | [10]                                 |
|                                     |                                |                             |           |                    |                  |               |                                                 | 1993                | 1.6                   |                                      |
|                                     |                                |                             |           |                    |                  |               |                                                 | 1997                | 0.02                  |                                      |
|                                     |                                |                             |           |                    |                  |               |                                                 | 2000                | 0.9                   |                                      |
|                                     |                                |                             |           |                    |                  |               |                                                 | 2002                | 1.6                   |                                      |
| <b>41</b>                           | Ria Formosa                    | Temperate<br>North Atlantic | Portugal  | 1940               | 1998             | <100ha        | 1.84                                            | 1940                | 7.1                   | [11]                                 |
|                                     |                                |                             |           |                    |                  |               |                                                 | 1980                | 6                     |                                      |
|                                     |                                |                             |           |                    |                  |               |                                                 | 1989                | 7.9                   |                                      |
|                                     |                                |                             |           |                    |                  |               |                                                 | 1996                | 50.1                  |                                      |
|                                     |                                |                             |           |                    |                  |               |                                                 | 1998                | 20.7                  |                                      |
| <b>44</b>                           | Urangan                        | Tropical Indo-<br>Pacific   | Australia | 1998               | 2002             | <100ha        | 0.21                                            | 1998                | 91.48                 | [12]                                 |
|                                     |                                |                             |           |                    |                  |               |                                                 | 1999                | 0                     |                                      |
|                                     |                                |                             |           |                    |                  |               |                                                 | 1999                | 0                     |                                      |
|                                     |                                |                             |           |                    |                  |               |                                                 | 2002                | 92.26                 |                                      |
| <b>45</b>                           | Wanggoolba<br>Creek            | Tropical Indo-<br>Pacific   | Australia | 1998               | 2002             | <100ha        | 2.99                                            | 1998                | 119.5                 | [12]                                 |
|                                     |                                |                             |           |                    |                  |               |                                                 | 1999                | 4.37                  |                                      |
|                                     |                                |                             |           |                    |                  |               |                                                 | 1999                | 0                     |                                      |
|                                     |                                |                             |           |                    |                  |               |                                                 | 2002                | 134.7                 |                                      |
| <b>46</b>                           | Northern Great<br>Sandy Strait | Tropical Indo-<br>Pacific   | Australia | 1998               | 2002             | >1000ha       | 15.52                                           | 1998                | 1995                  | [12]                                 |
|                                     |                                |                             |           |                    |                  |               |                                                 | 1999                | 913.3                 |                                      |

| Site reference number<br>(database) | Site name            | Global seagrass bioregion | Country   | Year study started | Year study ended | Area category | Specific rate of change, $\mu$<br>(% $y^{-1}$ ) | Year of data record | Area recorded<br>(Ha) | Data source<br>(publication number*) |
|-------------------------------------|----------------------|---------------------------|-----------|--------------------|------------------|---------------|-------------------------------------------------|---------------------|-----------------------|--------------------------------------|
|                                     |                      |                           |           |                    |                  |               |                                                 | 1999                | 98.1                  |                                      |
|                                     |                      |                           |           |                    |                  |               |                                                 | 2002                | 3712                  |                                      |
| <b>62</b>                           | Marseilles           | Mediterranean             | France    | 1984               | 1999             | <1ha          | 1.27                                            | 1984                | 0.67                  | [13]                                 |
|                                     |                      |                           |           |                    |                  |               |                                                 | 1987                | 0.63                  |                                      |
|                                     |                      |                           |           |                    |                  |               |                                                 | 1991                | 0.68                  |                                      |
|                                     |                      |                           |           |                    |                  |               |                                                 | 1994                | 0.7                   |                                      |
|                                     |                      |                           |           |                    |                  |               |                                                 | 1999                | 0.81                  |                                      |
| <b>65</b>                           | Cockburn Sound East  | Temperate Southern Oceans | Australia | 1967               | 1999             | <1000ha       | -15.32                                          | 1967                | 1750                  | [14]                                 |
|                                     |                      |                           |           |                    |                  |               |                                                 | 1972                | 310                   |                                      |
|                                     |                      |                           |           |                    |                  |               |                                                 | 1981                | 14                    |                                      |
|                                     |                      |                           |           |                    |                  |               |                                                 | 1994                | 26                    |                                      |
|                                     |                      |                           |           |                    |                  |               |                                                 | 1999                | 13                    |                                      |
| <b>66</b>                           | Cockburn Sound South | Temperate Southern Oceans | Australia | 1967               | 1999             | <1000ha       | -2.42                                           | 1967                | 634                   | [14]                                 |
|                                     |                      |                           |           |                    |                  |               |                                                 | 1972                | 528                   |                                      |
|                                     |                      |                           |           |                    |                  |               |                                                 | 1981                | 283                   |                                      |
|                                     |                      |                           |           |                    |                  |               |                                                 | 1994                | 291                   |                                      |
|                                     |                      |                           |           |                    |                  |               |                                                 | 1999                | 292                   |                                      |
| <b>67</b>                           | Cockburn Sound West  | Temperate Southern Oceans | Australia | 1967               | 1999             | <1000ha       | -1.33                                           | 1967                | 545                   | [14]                                 |
|                                     |                      |                           |           |                    |                  |               |                                                 | 1972                | 504                   |                                      |
|                                     |                      |                           |           |                    |                  |               |                                                 | 1981                | 443                   |                                      |
|                                     |                      |                           |           |                    |                  |               |                                                 | 1994                | 372                   |                                      |
|                                     |                      |                           |           |                    |                  |               |                                                 | 1999                | 356                   |                                      |
| <b>69</b>                           | Hornillo Bay         | Mediterranean             | Spain     | 1988               | 1998             | <100ha        | -7.52                                           | 1988                | 40                    | [15]                                 |
|                                     |                      |                           |           |                    |                  |               |                                                 | 1994                | 18.85                 |                                      |
|                                     |                      |                           |           |                    |                  |               |                                                 | 1998                | 18.85                 |                                      |
| <b>70</b>                           | Success Bank East    | Temperate Southern Oceans | Australia | 1965               | 2004             | <1000ha       | 1.91                                            | 1965                | 229.4                 | [16]                                 |

| Site reference number<br>(database) | Site name            | Global seagrass bioregion | Country   | Year study started | Year study ended | Area category | Specific rate of change, $\mu$<br>(% $y^{-1}$ ) | Year of data record | Area recorded<br>(Ha) | Data source<br>(publication number*) |
|-------------------------------------|----------------------|---------------------------|-----------|--------------------|------------------|---------------|-------------------------------------------------|---------------------|-----------------------|--------------------------------------|
|                                     |                      |                           |           |                    |                  |               |                                                 | 1972                | 340.9                 |                                      |
|                                     |                      |                           |           |                    |                  |               |                                                 | 1982                | 456.5                 |                                      |
|                                     |                      |                           |           |                    |                  |               |                                                 | 1995                | 482.7                 |                                      |
| 71                                  | Success Bank Central | Temperate Southern Oceans | Australia | 1965               | 2004             | <1000ha       | 1.47                                            | 1965                | 53.4                  | [16]                                 |
|                                     |                      |                           |           |                    |                  |               |                                                 | 1972                | 121.9                 |                                      |
|                                     |                      |                           |           |                    |                  |               |                                                 | 1982                | 138.8                 |                                      |
|                                     |                      |                           |           |                    |                  |               |                                                 | 1995                | 94.6                  |                                      |
| 72                                  | Success Bank West    | Temperate Southern Oceans | Australia | 1965               | 2004             | <1000ha       | 1.83                                            | 1965                | 224.5                 | [16]                                 |
|                                     |                      |                           |           |                    |                  |               |                                                 | 1972                | 297.7                 |                                      |
|                                     |                      |                           |           |                    |                  |               |                                                 | 1982                | 382.8                 |                                      |
|                                     |                      |                           |           |                    |                  |               |                                                 | 1995                | 458.6                 |                                      |
| 73                                  | Parmelia Bank East   | Temperate Southern Oceans | Australia | 1965               | 2004             | <1000ha       | -1.04                                           | 1965                | 487                   | [16]                                 |
|                                     |                      |                           |           |                    |                  |               |                                                 | 1972                | 491.5                 |                                      |
|                                     |                      |                           |           |                    |                  |               |                                                 | 1982                | 289.2                 |                                      |
|                                     |                      |                           |           |                    |                  |               |                                                 | 1995                | 324.1                 |                                      |
| 74                                  | Parmelia Bank West   | Temperate Southern Oceans | Australia | 1965               | 2004             | <1000ha       | 1.06                                            | 1965                | 248.1                 | [16]                                 |
|                                     |                      |                           |           |                    |                  |               |                                                 | 1972                | 285.2                 |                                      |
|                                     |                      |                           |           |                    |                  |               |                                                 | 1982                | 343.6                 |                                      |
|                                     |                      |                           |           |                    |                  |               |                                                 | 1995                | 375.1                 |                                      |
| 75                                  | Spencer Gulf         | Temperate Southern Oceans | Australia | 1987               | 1994             | >1000ha       | -13.05                                          | 1987                | 15953                 | [17]                                 |
|                                     |                      |                           |           |                    |                  |               |                                                 | 1994                | 6401                  |                                      |
| 78                                  | Vaccares Lagoon      | Mediterranean             | France    | 1984               | 1994             | >1000ha       | 3.60                                            | 1984                | 3000                  | [18]                                 |
|                                     |                      |                           |           |                    |                  |               |                                                 | 1994                | 4300                  |                                      |
| 79                                  | Izembek Lagoon       | Temperate                 | USA       | 1978               | 1987             | >1000ha       | 0.63                                            | 1978                | 15067                 | [19]                                 |



| Site reference number<br>(database) | Site name                      | Global seagrass bioregion | Country   | Year study started | Year study ended | Area category | Specific rate of change, $\mu$<br>(% $y^{-1}$ ) | Year of data record | Area recorded<br>(Ha) | Data source<br>(publication number*) |
|-------------------------------------|--------------------------------|---------------------------|-----------|--------------------|------------------|---------------|-------------------------------------------------|---------------------|-----------------------|--------------------------------------|
|                                     |                                | North Pacific             |           |                    |                  |               |                                                 | 1987                | 15915                 |                                      |
|                                     |                                |                           |           |                    |                  |               |                                                 | 1995                | 15951                 |                                      |
| <b>81</b>                           | Tuggerah Lakes                 | Temperate Southern Oceans | Australia | 1954               | 1985             | >1000ha       | 5.48                                            | 1954                | 350                   | [20]                                 |
|                                     |                                |                           |           |                    |                  |               |                                                 | 1963                | 4190                  |                                      |
|                                     |                                |                           |           |                    |                  |               |                                                 | 1965                | 3120                  |                                      |
|                                     |                                |                           |           |                    |                  |               |                                                 | 1966                | 2820                  |                                      |
|                                     |                                |                           |           |                    |                  |               |                                                 | 1980                | 1434                  |                                      |
|                                     |                                |                           |           |                    |                  |               |                                                 | 1981                | 1313                  |                                      |
|                                     |                                |                           |           |                    |                  |               |                                                 | 1981                | 1760                  |                                      |
|                                     |                                |                           |           |                    |                  |               |                                                 | 1982                | 1419                  |                                      |
|                                     |                                |                           |           |                    |                  |               |                                                 | 1983                | 1864                  |                                      |
|                                     |                                |                           |           |                    |                  |               |                                                 | 1984                | 1628                  |                                      |
|                                     |                                |                           |           |                    |                  |               |                                                 | 1985                | 1911                  |                                      |
| <b>82</b>                           | Urbinu Lagoon                  | Mediterranean             | France    | 1990               | 1999             | <1000ha       | 0.67                                            | 1990                | 137.2597              | [21]                                 |
|                                     |                                |                           |           |                    |                  |               |                                                 | 1994                | 106.1578              |                                      |
|                                     |                                |                           |           |                    |                  |               |                                                 | 1996                | 161.6553              |                                      |
|                                     |                                |                           |           |                    |                  |               |                                                 | 1999                | 145.8419              |                                      |
| <b>83</b>                           | Botany Bay, Northern Shoreline | Temperate Southern Oceans | Australia | 1930               | 1985             | <100ha        | -0.47                                           | 1930                | 35                    | [22]                                 |
|                                     |                                |                           |           |                    |                  |               |                                                 | 1942                | 93                    |                                      |
|                                     |                                |                           |           |                    |                  |               |                                                 | 1951                | 22                    |                                      |
|                                     |                                |                           |           |                    |                  |               |                                                 | 1961                | 49                    |                                      |
|                                     |                                |                           |           |                    |                  |               |                                                 | 1977                | 16                    |                                      |
|                                     |                                |                           |           |                    |                  |               |                                                 | 1985                | 27                    |                                      |
| <b>84</b>                           | Botany Bay, Southern Shoreline | Temperate Southern Oceans | Australia | 1942               | 1984             | <1000ha       | -0.61                                           | 1942                | 668                   | [22]                                 |
|                                     |                                |                           |           |                    |                  |               |                                                 | 1951                | 567                   |                                      |
|                                     |                                |                           |           |                    |                  |               |                                                 | 1961                | 598                   |                                      |
|                                     |                                |                           |           |                    |                  |               |                                                 | 1970                | 740                   |                                      |

| Site reference number<br>(database) | Site name          | Global seagrass bioregion | Country     | Year study started | Year study ended | Area category | Specific rate of change, $\mu$<br>(% $y^{-1}$ ) | Year of data record | Area recorded<br>(Ha) | Data source<br>(publication number*) |
|-------------------------------------|--------------------|---------------------------|-------------|--------------------|------------------|---------------|-------------------------------------------------|---------------------|-----------------------|--------------------------------------|
|                                     |                    |                           |             |                    |                  |               |                                                 | 1977                | 483                   |                                      |
|                                     |                    |                           |             |                    |                  |               |                                                 | 1979                | 394                   |                                      |
|                                     |                    |                           |             |                    |                  |               |                                                 | 1982                | 541                   |                                      |
|                                     |                    |                           |             |                    |                  |               |                                                 | 1984                | 516                   |                                      |
| <b>88</b>                           | Glenan Archipelago | Temperate North Atlantic  | France      | 1932               | 1992             | <1000ha       | -0.98                                           | 1932                | 278.8                 | [23]                                 |
|                                     |                    |                           |             |                    |                  |               |                                                 | 1952                | 128.3                 |                                      |
|                                     |                    |                           |             |                    |                  |               |                                                 | 1961                | 168.4                 |                                      |
|                                     |                    |                           |             |                    |                  |               |                                                 | 1967                | 175.3                 |                                      |
|                                     |                    |                           |             |                    |                  |               |                                                 | 1969                | 161.2                 |                                      |
|                                     |                    |                           |             |                    |                  |               |                                                 | 1976                | 170.3                 |                                      |
|                                     |                    |                           |             |                    |                  |               |                                                 | 1978                | 154.9                 |                                      |
|                                     |                    |                           |             |                    |                  |               |                                                 | 1982                | 145.9                 |                                      |
|                                     |                    |                           |             |                    |                  |               |                                                 | 1987                | 115.8                 |                                      |
|                                     |                    |                           |             |                    |                  |               |                                                 | 1990                | 154.6                 |                                      |
| <b>96</b>                           | Mourillion         | Mediterranean             | France      | 1964               | 1999             | <1000ha       | -1.81                                           | 1964                | 147                   | [24]                                 |
|                                     |                    |                           |             |                    |                  |               |                                                 | 1979                | 78                    |                                      |
| <b>97</b>                           | Marseille          | Mediterranean             | France      | 1900               | 1994             | <1000ha       | -0.62                                           | 1900                | 471                   | [24]                                 |
|                                     |                    |                           |             |                    |                  |               |                                                 | 1994                | 263                   |                                      |
| <b>115</b>                          | Whangamata Harbour | Temperate Southern Oceans | New Zealand | 1944               | 1998             | <100ha        | -0.51                                           | 1944                | 79                    | [25]                                 |
|                                     |                    |                           |             |                    |                  |               |                                                 | 1998                | 60                    |                                      |
| <b>116</b>                          | Wallis Lake        | Temperate Southern Oceans | Australia   | 1988               | 2002             | >1000ha       | -0.95                                           | 1988                | 2374                  | [26]                                 |
|                                     |                    |                           |             |                    |                  |               |                                                 | 1991                | 2184                  |                                      |
|                                     |                    |                           |             |                    |                  |               |                                                 | 1995                | 1856                  |                                      |
|                                     |                    |                           |             |                    |                  |               |                                                 | 2002                | 2078                  |                                      |
| <b>119</b>                          | Esperance Bay      | Temperate Southern Oceans | Australia   | 1956               | 2001             | <1000ha       | -0.57                                           | 1956                | 585                   | [27]                                 |
|                                     |                    |                           |             |                    |                  |               |                                                 | 1969                | 509                   |                                      |
|                                     |                    |                           |             |                    |                  |               |                                                 | 1977                | 428                   |                                      |

| Site reference number<br>(database) | Site name                 | Global seagrass bioregion | Country   | Year study started | Year study ended | Area category | Specific rate of change, $\mu$<br>(% $y^{-1}$ ) | Year of data record | Area recorded<br>(Ha) | Data source<br>(publication number*) |
|-------------------------------------|---------------------------|---------------------------|-----------|--------------------|------------------|---------------|-------------------------------------------------|---------------------|-----------------------|--------------------------------------|
|                                     |                           |                           |           |                    |                  |               |                                                 | 1989                | 482                   |                                      |
|                                     |                           |                           |           |                    |                  |               |                                                 | 1995                | 463                   |                                      |
|                                     |                           |                           |           |                    |                  |               |                                                 | 2001                | 453                   |                                      |
| 120                                 | Warnbro Sound             | Temperate Southern Oceans | Australia | 1953               | 2002             | <1000ha       | -0.64                                           | 1953                | 273                   | [28]                                 |
|                                     |                           |                           |           |                    |                  |               |                                                 | 1963                | 263                   |                                      |
|                                     |                           |                           |           |                    |                  |               |                                                 | 1989                | 265                   |                                      |
|                                     |                           |                           |           |                    |                  |               |                                                 | 1995                | 223                   |                                      |
|                                     |                           |                           |           |                    |                  |               |                                                 | 2002                | 200                   |                                      |
| 121                                 | Swan-Canning Estuary      | Temperate Southern Oceans | Australia | 1976               | 1982             | <1000ha       | 0.87                                            | 1976                | 563                   | [29]                                 |
|                                     |                           |                           |           |                    |                  |               |                                                 | 1982                | 593                   |                                      |
| 123                                 | Princess Royal Harbour    | Temperate Southern Oceans | Australia | 1960               | 1988             | <1000ha       | -6.25                                           | 1960                | 1440                  | [30]                                 |
|                                     |                           |                           |           |                    |                  |               |                                                 | 1988                | 250                   |                                      |
| 124                                 | Oyster Harbour            | Temperate Southern Oceans | Australia | 1960               | 1988             | <1000ha       | -5.52                                           | 1960                | 610                   | [30]                                 |
|                                     |                           |                           |           |                    |                  |               |                                                 | 1988                | 130                   |                                      |
| 126                                 | Hamblin Pond, Waquoit Bay | Temperate North Atlantic  | USA       | 1987               | 1997             | <100ha        | -9.78                                           | 1987                | 17.3                  | [31]                                 |
|                                     |                           |                           |           |                    |                  |               |                                                 | 1988                | 19.3                  |                                      |
|                                     |                           |                           |           |                    |                  |               |                                                 | 1989                | 14.6                  |                                      |
|                                     |                           |                           |           |                    |                  |               |                                                 | 1992                | 10.1                  |                                      |
|                                     |                           |                           |           |                    |                  |               |                                                 | 1997                | 6.5                   |                                      |
| 127                                 | Eel Pond, Waquoit Bay     | Temperate North Atlantic  | USA       | 1987               | 2000             | <10ha         | undefined                                       | 1987                | 14.3                  | [31]                                 |
|                                     |                           |                           |           |                    |                  |               |                                                 | 1988                | 13.3                  |                                      |
|                                     |                           |                           |           |                    |                  |               |                                                 | 1989                | 12.1                  |                                      |
|                                     |                           |                           |           |                    |                  |               |                                                 | 1992                | 6.2                   |                                      |
|                                     |                           |                           |           |                    |                  |               |                                                 | 1994                | 0.66                  |                                      |

| Site reference number<br>(database) | Site name                  | Global seagrass bioregion | Country | Year study started | Year study ended | Area category | Specific rate of change, $\mu$<br>(% $y^{-1}$ ) | Year of data record | Area recorded (Ha) | Data source (publication number*) |
|-------------------------------------|----------------------------|---------------------------|---------|--------------------|------------------|---------------|-------------------------------------------------|---------------------|--------------------|-----------------------------------|
|                                     |                            |                           |         |                    |                  |               |                                                 | 2000                | 0                  |                                   |
| 128                                 | Jehu Pond, Waquoit Bay     | Temperate North Atlantic  | USA     | 1987               | 1997             | <10ha         | -17.77                                          | 1987                | 11.8               | [31]                              |
|                                     |                            |                           |         |                    |                  |               |                                                 | 1988                | 9.6                |                                   |
|                                     |                            |                           |         |                    |                  |               |                                                 | 1989                | 4.3                |                                   |
|                                     |                            |                           |         |                    |                  |               |                                                 | 1992                | 4.5                |                                   |
|                                     |                            |                           |         |                    |                  |               |                                                 | 1997                | 2                  |                                   |
| 129                                 | Central Basin, Waquoit Bay | Temperate North Atlantic  | USA     | 1987               | 1992             | <100ha        | -27.88                                          | 1987                | 23.2               | [31]                              |
|                                     |                            |                           |         |                    |                  |               |                                                 | 1988                | 9.7                |                                   |
|                                     |                            |                           |         |                    |                  |               |                                                 | 1989                | 12.6               |                                   |
|                                     |                            |                           |         |                    |                  |               |                                                 | 1992                | 5.8                |                                   |
| 130                                 | Great River, Waquoit Bay   | Temperate North Atlantic  | USA     | 1987               | 1992             | <10ha         | -24.87                                          | 1987                | 14.4               | [31]                              |
|                                     |                            |                           |         |                    |                  |               |                                                 | 1988                | 10.4               |                                   |
|                                     |                            |                           |         |                    |                  |               |                                                 | 1989                | 6.0                |                                   |
|                                     |                            |                           |         |                    |                  |               |                                                 | 1992                | 4.2                |                                   |
| 131                                 | Tim's Pond, Waquoit Bay    | Temperate North Atlantic  | USA     | 1987               | 1992             | <10ha         | 1.75                                            | 1987                | 2.4                | [31]                              |
|                                     |                            |                           |         |                    |                  |               |                                                 | 1988                | 2.3                |                                   |
|                                     |                            |                           |         |                    |                  |               |                                                 | 1989                | 2.3                |                                   |
|                                     |                            |                           |         |                    |                  |               |                                                 | 1992                | 2.6                |                                   |
| 132                                 | Offshore, Waquoit Bay      | Temperate North Atlantic  | USA     | 1987               | 1992             | <1ha          | -1.84                                           | 1987                | 1.0                | [31]                              |
|                                     |                            |                           |         |                    |                  |               |                                                 | 1988                | 0.9                |                                   |
|                                     |                            |                           |         |                    |                  |               |                                                 | 1989                | 0.8                |                                   |
|                                     |                            |                           |         |                    |                  |               |                                                 | 1992                | 0.9                |                                   |
| 133                                 | Ninigret Pond              | Temperate North Atlantic  | USA     | 1960               | 1992             | <10ha         | -1.68                                           | 1960                | 5.2                | [32]                              |
|                                     |                            |                           |         |                    |                  |               |                                                 | 1974                | 4.4                |                                   |
|                                     |                            |                           |         |                    |                  |               |                                                 | 1980                | 3.3                |                                   |
|                                     |                            |                           |         |                    |                  |               |                                                 | 1992                | 3.1                |                                   |
| 134                                 | Japan                      | Temperate North Pacific   | Japan   | 1978               | 1991             | >1000ha       | -0.30                                           | 1978                | 51500              | [33]                              |

| Site reference number<br>(database) | Site name                      | Global seagrass bioregion | Country | Year study started | Year study ended | Area category | Specific rate of change, $\mu$<br>(% $y^{-1}$ ) | Year of data record | Area recorded<br>(Ha) | Data source<br>(publication number*) |
|-------------------------------------|--------------------------------|---------------------------|---------|--------------------|------------------|---------------|-------------------------------------------------|---------------------|-----------------------|--------------------------------------|
|                                     |                                |                           |         |                    |                  |               |                                                 | 1991                | 49500                 |                                      |
| <b>136</b>                          | Puget Sound                    | Temperate North Pacific   | USA     | 2000               | 2004             | >1000ha       | 8.27                                            | 2000                | 14470                 | [34]                                 |
|                                     |                                |                           |         |                    |                  |               |                                                 | 2001                | 20990                 |                                      |
|                                     |                                |                           |         |                    |                  |               |                                                 | 2002                | 20390                 |                                      |
|                                     |                                |                           |         |                    |                  |               |                                                 | 2003                | 20620                 |                                      |
|                                     |                                |                           |         |                    |                  |               |                                                 | 2004                | 20140                 |                                      |
| <b>137</b>                          | Indian River Lagoon segment SV | Tropical Atlantic         | USA     | 1943               | 2005             | <1000ha       | -0.31                                           | 1943                | 305                   | [35]                                 |
|                                     |                                |                           |         |                    |                  |               |                                                 | 1986                | 43.2                  |                                      |
|                                     |                                |                           |         |                    |                  |               |                                                 | 1989                | 34.8                  |                                      |
|                                     |                                |                           |         |                    |                  |               |                                                 | 1992                | 67.1                  |                                      |
|                                     |                                |                           |         |                    |                  |               |                                                 | 1994                | 61.7                  |                                      |
|                                     |                                |                           |         |                    |                  |               |                                                 | 1996                | 119.8                 |                                      |
|                                     |                                |                           |         |                    |                  |               |                                                 | 1999                | 205.3                 |                                      |
|                                     |                                |                           |         |                    |                  |               |                                                 | 2001                | 214.9                 |                                      |
|                                     |                                |                           |         |                    |                  |               |                                                 | 2003                | 241.7                 |                                      |
|                                     |                                |                           |         |                    |                  |               |                                                 | 2005                | 252                   |                                      |
| <b>138</b>                          | Indian River Lagoon Segment NV | Tropical Atlantic         | USA     | 1943               | 2005             | <1000ha       | 0.08                                            | 1943                | 233                   | [35]                                 |
|                                     |                                |                           |         |                    |                  |               |                                                 | 1986                | 18                    |                                      |
|                                     |                                |                           |         |                    |                  |               |                                                 | 1989                | 47.1                  |                                      |
|                                     |                                |                           |         |                    |                  |               |                                                 | 1992                | 29.9                  |                                      |
|                                     |                                |                           |         |                    |                  |               |                                                 | 1994                | 92.5                  |                                      |
|                                     |                                |                           |         |                    |                  |               |                                                 | 1996                | 134.3                 |                                      |
|                                     |                                |                           |         |                    |                  |               |                                                 | 1999                | 194.5                 |                                      |
|                                     |                                |                           |         |                    |                  |               |                                                 | 2001                | 220.4                 |                                      |
|                                     |                                |                           |         |                    |                  |               |                                                 | 2003                | 242.3                 |                                      |
|                                     |                                |                           |         |                    |                  |               |                                                 | 2005                | 245                   |                                      |
| <b>139</b>                          | Indian River Lagoon Segment MP | Tropical Atlantic         | USA     | 1943               | 2005             | <1000ha       | -0.68                                           | 1943                | 411.8                 | [35]                                 |

| Site reference number<br>(database) | Site name              | Global seagrass bioregion | Country | Year study started | Year study ended | Area category | Specific rate of change, $\mu$<br>(% $y^{-1}$ ) | Year of data record | Area recorded<br>(Ha) | Data source<br>(publication number*) |
|-------------------------------------|------------------------|---------------------------|---------|--------------------|------------------|---------------|-------------------------------------------------|---------------------|-----------------------|--------------------------------------|
|                                     |                        |                           |         |                    |                  |               |                                                 | 1986                | 243.8                 |                                      |
|                                     |                        |                           |         |                    |                  |               |                                                 | 1989                | 240.8                 |                                      |
|                                     |                        |                           |         |                    |                  |               |                                                 | 1992                | 246.5                 |                                      |
|                                     |                        |                           |         |                    |                  |               |                                                 | 1994                | 152.4                 |                                      |
|                                     |                        |                           |         |                    |                  |               |                                                 | 1996                | 240.5                 |                                      |
|                                     |                        |                           |         |                    |                  |               |                                                 | 1999                | 243.1                 |                                      |
|                                     |                        |                           |         |                    |                  |               |                                                 | 2001                | 264.5                 |                                      |
|                                     |                        |                           |         |                    |                  |               |                                                 | 2003                | 267.8                 |                                      |
|                                     |                        |                           |         |                    |                  |               |                                                 | 2005                | 269.5                 |                                      |
| <b>140</b>                          | Bermuda Platform       | Tropical Atlantic         | Bermuda | 1997               | 2004             | >1000ha       | -3.66                                           | 1997                | 2100                  | [36]                                 |
|                                     |                        |                           |         |                    |                  |               |                                                 | 2004                | 1625                  |                                      |
| <b>164</b>                          | Lower Laguna Madre     | Tropical Atlantic         | USA     | 1965               | 1988             | >1000ha       | -0.80                                           | 1965                | 66608                 | [37]                                 |
|                                     |                        |                           |         |                    |                  |               |                                                 | 1974                | 54468                 |                                      |
|                                     |                        |                           |         |                    |                  |               |                                                 | 1988                | 55437                 |                                      |
| <b>165</b>                          | Turkey Point           | Tropical Atlantic         | USA     | 1967               | 1969             | <100ha        | undefined                                       | 1967                | 20.2                  | [38]                                 |
|                                     |                        |                           |         |                    |                  |               |                                                 | 1968                | 13.1                  |                                      |
|                                     |                        |                           |         |                    |                  |               |                                                 | 1969                | 0                     |                                      |
| <b>201</b>                          | CB5MH - Chesapeake Bay | Temperate North Atlantic  | USA     | 1984               | 2005             | <1000ha       | 6.22                                            | 1984                | 270                   | [39]                                 |
|                                     |                        |                           |         |                    |                  |               |                                                 | 1985                | 172                   |                                      |
|                                     |                        |                           |         |                    |                  |               |                                                 | 1986                | 203                   |                                      |
|                                     |                        |                           |         |                    |                  |               |                                                 | 1987                | 321                   |                                      |
|                                     |                        |                           |         |                    |                  |               |                                                 | 1989                | 490                   |                                      |
|                                     |                        |                           |         |                    |                  |               |                                                 | 1990                | 608                   |                                      |
|                                     |                        |                           |         |                    |                  |               |                                                 | 1991                | 635                   |                                      |
|                                     |                        |                           |         |                    |                  |               |                                                 | 1992                | 778                   |                                      |
|                                     |                        |                           |         |                    |                  |               |                                                 | 1993                | 813                   |                                      |
|                                     |                        |                           |         |                    |                  |               |                                                 | 1994                | 757                   |                                      |
|                                     |                        |                           |         |                    |                  |               |                                                 | 1995                | 703                   |                                      |
|                                     |                        |                           |         |                    |                  |               |                                                 | 1996                | 709                   |                                      |
|                                     |                        |                           |         |                    |                  |               |                                                 | 1997                | 667                   |                                      |

| Site reference number<br>(database) | Site name                 | Global seagrass bioregion   | Country | Year study started | Year study ended | Area category | Specific rate of change, $\mu$<br>(% $y^{-1}$ ) | Year of data record | Area recorded<br>(Ha) | Data source<br>(publication number*) |
|-------------------------------------|---------------------------|-----------------------------|---------|--------------------|------------------|---------------|-------------------------------------------------|---------------------|-----------------------|--------------------------------------|
|                                     |                           |                             |         |                    |                  |               |                                                 | 1998                | 659                   |                                      |
|                                     |                           |                             |         |                    |                  |               |                                                 | 1999                | 640                   |                                      |
|                                     |                           |                             |         |                    |                  |               |                                                 | 2000                | 725                   |                                      |
|                                     |                           |                             |         |                    |                  |               |                                                 | 2001                | 944                   |                                      |
|                                     |                           |                             |         |                    |                  |               |                                                 | 2002                | 1120                  |                                      |
|                                     |                           |                             |         |                    |                  |               |                                                 | 2003                | 352                   |                                      |
|                                     |                           |                             |         |                    |                  |               |                                                 | 2004                | 742                   |                                      |
|                                     |                           |                             |         |                    |                  |               |                                                 | 2005                | 997                   |                                      |
| <b>202</b>                          | CB6PH -<br>Chesapeake Bay | Temperate<br>North Atlantic | USA     | 1984               | 2005             | <1000ha       | -0.76                                           | 1984                | 305                   | [39]                                 |
|                                     |                           |                             |         |                    |                  |               |                                                 | 1985                | 328                   |                                      |
|                                     |                           |                             |         |                    |                  |               |                                                 | 1986                | 322                   |                                      |
|                                     |                           |                             |         |                    |                  |               |                                                 | 1987                | 242                   |                                      |
|                                     |                           |                             |         |                    |                  |               |                                                 | 1989                | 351                   |                                      |
|                                     |                           |                             |         |                    |                  |               |                                                 | 1990                | 373                   |                                      |
|                                     |                           |                             |         |                    |                  |               |                                                 | 1991                | 396                   |                                      |
|                                     |                           |                             |         |                    |                  |               |                                                 | 1992                | 467                   |                                      |
|                                     |                           |                             |         |                    |                  |               |                                                 | 1993                | 512                   |                                      |
|                                     |                           |                             |         |                    |                  |               |                                                 | 1994                | 454                   |                                      |
|                                     |                           |                             |         |                    |                  |               |                                                 | 1995                | 431                   |                                      |
|                                     |                           |                             |         |                    |                  |               |                                                 | 1996                | 396                   |                                      |
|                                     |                           |                             |         |                    |                  |               |                                                 | 1997                | 362                   |                                      |
|                                     |                           |                             |         |                    |                  |               |                                                 | 1998                | 313                   |                                      |
|                                     |                           |                             |         |                    |                  |               |                                                 | 1999                | 268                   |                                      |
|                                     |                           |                             |         |                    |                  |               |                                                 | 2000                | 288                   |                                      |
|                                     |                           |                             |         |                    |                  |               |                                                 | 2001                | 289                   |                                      |
|                                     |                           |                             |         |                    |                  |               |                                                 | 2002                | 310                   |                                      |
|                                     |                           |                             |         |                    |                  |               |                                                 | 2003                | 286                   |                                      |
|                                     |                           |                             |         |                    |                  |               |                                                 | 2004                | 198                   |                                      |
|                                     |                           |                             |         |                    |                  |               |                                                 | 2005                | 260                   |                                      |
| <b>203</b>                          | CB7PH -<br>Chesapeake Bay | Temperate<br>North Atlantic | USA     | 1984               | 2005             | >1000ha       | 0.74                                            | 1984                | 2822                  | [39]                                 |
|                                     |                           |                             |         |                    |                  |               |                                                 | 1985                | 2899                  |                                      |
|                                     |                           |                             |         |                    |                  |               |                                                 | 1986                | 2989                  |                                      |

| Site reference number<br>(database) | Site name                 | Global seagrass bioregion   | Country | Year study started | Year study ended | Area category | Specific rate of change, $\mu$<br>(% $y^{-1}$ ) | Year of data record | Area recorded<br>(Ha) | Data source<br>(publication number*) |
|-------------------------------------|---------------------------|-----------------------------|---------|--------------------|------------------|---------------|-------------------------------------------------|---------------------|-----------------------|--------------------------------------|
|                                     |                           |                             |         |                    |                  |               |                                                 | 1987                | 2942                  |                                      |
|                                     |                           |                             |         |                    |                  |               |                                                 | 1989                | 3241                  |                                      |
|                                     |                           |                             |         |                    |                  |               |                                                 | 1990                | 3324                  |                                      |
|                                     |                           |                             |         |                    |                  |               |                                                 | 1991                | 4007                  |                                      |
|                                     |                           |                             |         |                    |                  |               |                                                 | 1992                | 4151                  |                                      |
|                                     |                           |                             |         |                    |                  |               |                                                 | 1993                | 4470                  |                                      |
|                                     |                           |                             |         |                    |                  |               |                                                 | 1994                | 4014                  |                                      |
|                                     |                           |                             |         |                    |                  |               |                                                 | 1995                | 3560                  |                                      |
|                                     |                           |                             |         |                    |                  |               |                                                 | 1996                | 3831                  |                                      |
|                                     |                           |                             |         |                    |                  |               |                                                 | 1997                | 3937                  |                                      |
|                                     |                           |                             |         |                    |                  |               |                                                 | 1998                | 3617                  |                                      |
|                                     |                           |                             |         |                    |                  |               |                                                 | 1999                | 3335                  |                                      |
|                                     |                           |                             |         |                    |                  |               |                                                 | 2000                | 3403                  |                                      |
|                                     |                           |                             |         |                    |                  |               |                                                 | 2001                | 3712                  |                                      |
|                                     |                           |                             |         |                    |                  |               |                                                 | 2002                | 3966                  |                                      |
|                                     |                           |                             |         |                    |                  |               |                                                 | 2003                | 3720                  |                                      |
|                                     |                           |                             |         |                    |                  |               |                                                 | 2004                | 2896                  |                                      |
|                                     |                           |                             |         |                    |                  |               |                                                 | 2005                | 3294                  |                                      |
| <b>204</b>                          | CB8PH -<br>Chesapeake Bay | Temperate<br>North Atlantic | USA     | 1984               | 2005             | <10ha         | undefined                                       | 1984                | 0                     | [39]                                 |
|                                     |                           |                             |         |                    |                  |               |                                                 | 1985                | 0                     |                                      |
|                                     |                           |                             |         |                    |                  |               |                                                 | 1986                | 0                     |                                      |
|                                     |                           |                             |         |                    |                  |               |                                                 | 1987                | 0                     |                                      |
|                                     |                           |                             |         |                    |                  |               |                                                 | 1989                | 0                     |                                      |
|                                     |                           |                             |         |                    |                  |               |                                                 | 1990                | 0                     |                                      |
|                                     |                           |                             |         |                    |                  |               |                                                 | 1991                | 0                     |                                      |
|                                     |                           |                             |         |                    |                  |               |                                                 | 1992                | 0                     |                                      |
|                                     |                           |                             |         |                    |                  |               |                                                 | 1993                | 0                     |                                      |
|                                     |                           |                             |         |                    |                  |               |                                                 | 1994                | 0                     |                                      |
|                                     |                           |                             |         |                    |                  |               |                                                 | 1995                | 4                     |                                      |
|                                     |                           |                             |         |                    |                  |               |                                                 | 1996                | 4                     |                                      |
|                                     |                           |                             |         |                    |                  |               |                                                 | 1997                | 4                     |                                      |
|                                     |                           |                             |         |                    |                  |               |                                                 | 1998                | 4                     |                                      |
|                                     |                           |                             |         |                    |                  |               |                                                 | 1999                | 3                     |                                      |



| Site reference number<br>(database) | Site name         | Global seagrass bioregion | Country | Year study started | Year study ended | Area category | Specific rate of change, $\mu$<br>(% $y^{-1}$ ) | Year of data record | Area recorded (Ha) | Data source (publication number*) |
|-------------------------------------|-------------------|---------------------------|---------|--------------------|------------------|---------------|-------------------------------------------------|---------------------|--------------------|-----------------------------------|
|                                     |                   |                           |         |                    |                  |               |                                                 | 2000                | 3                  |                                   |
|                                     |                   |                           |         |                    |                  |               |                                                 | 2001                | 3                  |                                   |
|                                     |                   |                           |         |                    |                  |               |                                                 | 2002                | 4                  |                                   |
|                                     |                   |                           |         |                    |                  |               |                                                 | 2003                | 2                  |                                   |
|                                     |                   |                           |         |                    |                  |               |                                                 | 2004                | 2                  |                                   |
|                                     |                   |                           |         |                    |                  |               |                                                 | 2005                | 4                  |                                   |
| <b>206</b>                          | JMSPH - James     | Temperate North Atlantic  | USA     | 1984               | 2005             | <100ha        | undefined                                       | 1984                | 0                  | [39]                              |
|                                     |                   |                           |         |                    |                  |               |                                                 | 1985                | 0                  |                                   |
|                                     |                   |                           |         |                    |                  |               |                                                 | 1986                | 0                  |                                   |
|                                     |                   |                           |         |                    |                  |               |                                                 | 1987                | 3                  |                                   |
|                                     |                   |                           |         |                    |                  |               |                                                 | 1989                | 4                  |                                   |
|                                     |                   |                           |         |                    |                  |               |                                                 | 1990                | 3                  |                                   |
|                                     |                   |                           |         |                    |                  |               |                                                 | 1991                | 3                  |                                   |
|                                     |                   |                           |         |                    |                  |               |                                                 | 1992                | 3                  |                                   |
|                                     |                   |                           |         |                    |                  |               |                                                 | 1993                | 4                  |                                   |
|                                     |                   |                           |         |                    |                  |               |                                                 | 1994                | 6                  |                                   |
|                                     |                   |                           |         |                    |                  |               |                                                 | 1995                | 15                 |                                   |
|                                     |                   |                           |         |                    |                  |               |                                                 | 1996                | 19                 |                                   |
|                                     |                   |                           |         |                    |                  |               |                                                 | 1997                | 76                 |                                   |
|                                     |                   |                           |         |                    |                  |               |                                                 | 1998                | 52                 |                                   |
|                                     |                   |                           |         |                    |                  |               |                                                 | 1999                | 31                 |                                   |
|                                     |                   |                           |         |                    |                  |               |                                                 | 2000                | 38                 |                                   |
|                                     |                   |                           |         |                    |                  |               |                                                 | 2001                | 94                 |                                   |
|                                     |                   |                           |         |                    |                  |               |                                                 | 2002                | 114                |                                   |
|                                     |                   |                           |         |                    |                  |               |                                                 | 2003                | 53                 |                                   |
|                                     |                   |                           |         |                    |                  |               |                                                 | 2004                | 30                 |                                   |
|                                     |                   |                           |         |                    |                  |               |                                                 | 2005                | 0                  |                                   |
| <b>207</b>                          | LYNPH - Lynnhaven | Temperate North Atlantic  | USA     | 1984               | 2005             | <100ha        | -7.42                                           | 1984                | 38                 | [39]                              |
|                                     |                   |                           |         |                    |                  |               |                                                 | 1985                | 37                 |                                   |
|                                     |                   |                           |         |                    |                  |               |                                                 | 1986                | 43                 |                                   |
|                                     |                   |                           |         |                    |                  |               |                                                 | 1987                | 40                 |                                   |
|                                     |                   |                           |         |                    |                  |               |                                                 | 1989                | 38                 |                                   |

| Site reference number<br>(database) | Site name          | Global seagrass bioregion   | Country | Year study started | Year study ended | Area category | Specific rate of change, $\mu$<br>(% $y^{-1}$ ) | Year of data record | Area recorded (Ha) | Data source (publication number*) |
|-------------------------------------|--------------------|-----------------------------|---------|--------------------|------------------|---------------|-------------------------------------------------|---------------------|--------------------|-----------------------------------|
|                                     |                    |                             |         |                    |                  |               |                                                 | 1990                | 29                 |                                   |
|                                     |                    |                             |         |                    |                  |               |                                                 | 1991                | 24                 |                                   |
|                                     |                    |                             |         |                    |                  |               |                                                 | 1992                | 20                 |                                   |
|                                     |                    |                             |         |                    |                  |               |                                                 | 1993                | 21                 |                                   |
|                                     |                    |                             |         |                    |                  |               |                                                 | 1994                | 43                 |                                   |
|                                     |                    |                             |         |                    |                  |               |                                                 | 1995                | 13                 |                                   |
|                                     |                    |                             |         |                    |                  |               |                                                 | 1996                | 30                 |                                   |
|                                     |                    |                             |         |                    |                  |               |                                                 | 1997                | 16                 |                                   |
|                                     |                    |                             |         |                    |                  |               |                                                 | 1998                | 17                 |                                   |
|                                     |                    |                             |         |                    |                  |               |                                                 | 1999                | 38                 |                                   |
|                                     |                    |                             |         |                    |                  |               |                                                 | 2000                | 19                 |                                   |
|                                     |                    |                             |         |                    |                  |               |                                                 | 2001                | 17                 |                                   |
|                                     |                    |                             |         |                    |                  |               |                                                 | 2002                | 16                 |                                   |
|                                     |                    |                             |         |                    |                  |               |                                                 | 2003                | 0                  |                                   |
|                                     |                    |                             |         |                    |                  |               |                                                 | 2004                | 4                  |                                   |
|                                     |                    |                             |         |                    |                  |               |                                                 | 2005                | 8                  |                                   |
| <b>208</b>                          | MOBPH -<br>Mobjack | Temperate<br>North Atlantic | USA     | 1984               | 2005             | >1000ha       | 0.30                                            | 1984                | 2736               | [39]                              |
|                                     |                    |                             |         |                    |                  |               |                                                 | 1985                | 2847               |                                   |
|                                     |                    |                             |         |                    |                  |               |                                                 | 1986                | 2821               |                                   |
|                                     |                    |                             |         |                    |                  |               |                                                 | 1987                | 2913               |                                   |
|                                     |                    |                             |         |                    |                  |               |                                                 | 1989                | 3667               |                                   |
|                                     |                    |                             |         |                    |                  |               |                                                 | 1990                | 3983               |                                   |
|                                     |                    |                             |         |                    |                  |               |                                                 | 1991                | 4287               |                                   |
|                                     |                    |                             |         |                    |                  |               |                                                 | 1992                | 4361               |                                   |
|                                     |                    |                             |         |                    |                  |               |                                                 | 1993                | 4430               |                                   |
|                                     |                    |                             |         |                    |                  |               |                                                 | 1994                | 4375               |                                   |
|                                     |                    |                             |         |                    |                  |               |                                                 | 1995                | 4389               |                                   |
|                                     |                    |                             |         |                    |                  |               |                                                 | 1996                | 4303               |                                   |
|                                     |                    |                             |         |                    |                  |               |                                                 | 1997                | 4442               |                                   |
|                                     |                    |                             |         |                    |                  |               |                                                 | 1998                | 4082               |                                   |
|                                     |                    |                             |         |                    |                  |               |                                                 | 1999                | 3584               |                                   |
|                                     |                    |                             |         |                    |                  |               |                                                 | 2000                | 3694               |                                   |
|                                     |                    |                             |         |                    |                  |               |                                                 | 2001                | 3850               |                                   |

| Site reference number<br>(database) | Site name          | Global seagrass bioregion | Country | Year study started | Year study ended | Area category | Specific rate of change, $\mu$<br>(% $y^{-1}$ ) | Year of data record | Area recorded<br>(Ha) | Data source<br>(publication number*) |
|-------------------------------------|--------------------|---------------------------|---------|--------------------|------------------|---------------|-------------------------------------------------|---------------------|-----------------------|--------------------------------------|
|                                     |                    |                           |         |                    |                  |               |                                                 | 2002                | 3538                  |                                      |
|                                     |                    |                           |         |                    |                  |               |                                                 | 2003                | 3423                  |                                      |
|                                     |                    |                           |         |                    |                  |               |                                                 | 2004                | 3055                  |                                      |
|                                     |                    |                           |         |                    |                  |               |                                                 | 2005                | 2916                  |                                      |
| <b>209</b>                          | PIAMH - Piankatank | Temperate North Atlantic  | USA     | 1984               | 2005             | <1000ha       | 14.52                                           | 1984                | 10                    | [39]                                 |
|                                     |                    |                           |         |                    |                  |               |                                                 | 1985                | 10                    |                                      |
|                                     |                    |                           |         |                    |                  |               |                                                 | 1986                | 10                    |                                      |
|                                     |                    |                           |         |                    |                  |               |                                                 | 1987                | 43                    |                                      |
|                                     |                    |                           |         |                    |                  |               |                                                 | 1989                | 142                   |                                      |
|                                     |                    |                           |         |                    |                  |               |                                                 | 1990                | 242                   |                                      |
|                                     |                    |                           |         |                    |                  |               |                                                 | 1991                | 270                   |                                      |
|                                     |                    |                           |         |                    |                  |               |                                                 | 1992                | 323                   |                                      |
|                                     |                    |                           |         |                    |                  |               |                                                 | 1993                | 435                   |                                      |
|                                     |                    |                           |         |                    |                  |               |                                                 | 1994                | 250                   |                                      |
|                                     |                    |                           |         |                    |                  |               |                                                 | 1995                | 144                   |                                      |
|                                     |                    |                           |         |                    |                  |               |                                                 | 1996                | 142                   |                                      |
|                                     |                    |                           |         |                    |                  |               |                                                 | 1997                | 175                   |                                      |
|                                     |                    |                           |         |                    |                  |               |                                                 | 1998                | 132                   |                                      |
|                                     |                    |                           |         |                    |                  |               |                                                 | 1999                | 117                   |                                      |
|                                     |                    |                           |         |                    |                  |               |                                                 | 2000                | 171                   |                                      |
|                                     |                    |                           |         |                    |                  |               |                                                 | 2001                | 218                   |                                      |
|                                     |                    |                           |         |                    |                  |               |                                                 | 2002                | 284                   |                                      |
|                                     |                    |                           |         |                    |                  |               |                                                 | 2003                | 181                   |                                      |
|                                     |                    |                           |         |                    |                  |               |                                                 | 2004                | 179                   |                                      |
|                                     |                    |                           |         |                    |                  |               |                                                 | 2005                | 211                   |                                      |
| <b>210</b>                          | POCMH - Pocomoke   | Temperate North Atlantic  | USA     | 1984               | 2005             | <1000ha       | 2.46                                            | 1984                | 431                   | [39]                                 |
|                                     |                    |                           |         |                    |                  |               |                                                 | 1985                | 385                   |                                      |
|                                     |                    |                           |         |                    |                  |               |                                                 | 1986                | 556                   |                                      |
|                                     |                    |                           |         |                    |                  |               |                                                 | 1987                | 474                   |                                      |
|                                     |                    |                           |         |                    |                  |               |                                                 | 1989                | 600                   |                                      |
|                                     |                    |                           |         |                    |                  |               |                                                 | 1990                | 595                   |                                      |
|                                     |                    |                           |         |                    |                  |               |                                                 | 1991                | 732                   |                                      |

| Site reference number<br>(database) | Site name            | Global seagrass bioregion | Country | Year study started | Year study ended | Area category | Specific rate of change, $\mu$<br>(% $y^{-1}$ ) | Year of data record | Area recorded<br>(Ha) | Data source<br>(publication number*) |
|-------------------------------------|----------------------|---------------------------|---------|--------------------|------------------|---------------|-------------------------------------------------|---------------------|-----------------------|--------------------------------------|
|                                     |                      |                           |         |                    |                  |               |                                                 | 1992                | 719                   |                                      |
|                                     |                      |                           |         |                    |                  |               |                                                 | 1993                | 776                   |                                      |
|                                     |                      |                           |         |                    |                  |               |                                                 | 1994                | 665                   |                                      |
|                                     |                      |                           |         |                    |                  |               |                                                 | 1995                | 655                   |                                      |
|                                     |                      |                           |         |                    |                  |               |                                                 | 1996                | 652                   |                                      |
|                                     |                      |                           |         |                    |                  |               |                                                 | 1997                | 530                   |                                      |
|                                     |                      |                           |         |                    |                  |               |                                                 | 1998                | 459                   |                                      |
|                                     |                      |                           |         |                    |                  |               |                                                 | 1999                | 466                   |                                      |
|                                     |                      |                           |         |                    |                  |               |                                                 | 2000                | 489                   |                                      |
|                                     |                      |                           |         |                    |                  |               |                                                 | 2001                | 619                   |                                      |
|                                     |                      |                           |         |                    |                  |               |                                                 | 2002                | 733                   |                                      |
|                                     |                      |                           |         |                    |                  |               |                                                 | 2003                | 674                   |                                      |
|                                     |                      |                           |         |                    |                  |               |                                                 | 2004                | 471                   |                                      |
|                                     |                      |                           |         |                    |                  |               |                                                 | 2005                | 723                   |                                      |
| <b>211</b>                          | RPPMH - Rappahannock | Temperate North Atlantic  | USA     | 1984               | 2005             | <100ha        | 11.42                                           | 1984                | 4                     | [39]                                 |
|                                     |                      |                           |         |                    |                  |               |                                                 | 1985                | 1                     |                                      |
|                                     |                      |                           |         |                    |                  |               |                                                 | 1986                | 0                     |                                      |
|                                     |                      |                           |         |                    |                  |               |                                                 | 1987                | 13                    |                                      |
|                                     |                      |                           |         |                    |                  |               |                                                 | 1989                | 48                    |                                      |
|                                     |                      |                           |         |                    |                  |               |                                                 | 1990                | 51                    |                                      |
|                                     |                      |                           |         |                    |                  |               |                                                 | 1991                | 31                    |                                      |
|                                     |                      |                           |         |                    |                  |               |                                                 | 1992                | 37                    |                                      |
|                                     |                      |                           |         |                    |                  |               |                                                 | 1993                | 62                    |                                      |
|                                     |                      |                           |         |                    |                  |               |                                                 | 1994                | 27                    |                                      |
|                                     |                      |                           |         |                    |                  |               |                                                 | 1995                | 19                    |                                      |
|                                     |                      |                           |         |                    |                  |               |                                                 | 1996                | 12                    |                                      |
|                                     |                      |                           |         |                    |                  |               |                                                 | 1997                | 9                     |                                      |
|                                     |                      |                           |         |                    |                  |               |                                                 | 1998                | 5                     |                                      |
|                                     |                      |                           |         |                    |                  |               |                                                 | 1999                | 3                     |                                      |
|                                     |                      |                           |         |                    |                  |               |                                                 | 2000                | 10                    |                                      |
|                                     |                      |                           |         |                    |                  |               |                                                 | 2001                | 57                    |                                      |
|                                     |                      |                           |         |                    |                  |               |                                                 | 2002                | 122                   |                                      |
|                                     |                      |                           |         |                    |                  |               |                                                 | 2003                | 9                     |                                      |

| Site reference number<br>(database) | Site name       | Global seagrass bioregion | Country | Year study started | Year study ended | Area category | Specific rate of change, $\mu$<br>(% $y^{-1}$ ) | Year of data record | Area recorded<br>(Ha) | Data source<br>(publication number*) |
|-------------------------------------|-----------------|---------------------------|---------|--------------------|------------------|---------------|-------------------------------------------------|---------------------|-----------------------|--------------------------------------|
|                                     |                 |                           |         |                    |                  |               |                                                 | 2004                | 5                     |                                      |
|                                     |                 |                           |         |                    |                  |               |                                                 | 2005                | 44                    |                                      |
| <b>212</b>                          | TANMH - Tangier | Temperate North Atlantic  | USA     | 1984               | 2005             | >1000ha       | -0.42                                           | 1984                | 4486                  | [39]                                 |
|                                     |                 |                           |         |                    |                  |               |                                                 | 1985                | 4441                  |                                      |
|                                     |                 |                           |         |                    |                  |               |                                                 | 1986                | 5173                  |                                      |
|                                     |                 |                           |         |                    |                  |               |                                                 | 1987                | 4250                  |                                      |
|                                     |                 |                           |         |                    |                  |               |                                                 | 1989                | 5391                  |                                      |
|                                     |                 |                           |         |                    |                  |               |                                                 | 1990                | 5535                  |                                      |
|                                     |                 |                           |         |                    |                  |               |                                                 | 1991                | 5941                  |                                      |
|                                     |                 |                           |         |                    |                  |               |                                                 | 1992                | 5996                  |                                      |
|                                     |                 |                           |         |                    |                  |               |                                                 | 1993                | 5727                  |                                      |
|                                     |                 |                           |         |                    |                  |               |                                                 | 1994                | 4325                  |                                      |
|                                     |                 |                           |         |                    |                  |               |                                                 | 1995                | 4065                  |                                      |
|                                     |                 |                           |         |                    |                  |               |                                                 | 1996                | 3965                  |                                      |
|                                     |                 |                           |         |                    |                  |               |                                                 | 1997                | 3738                  |                                      |
|                                     |                 |                           |         |                    |                  |               |                                                 | 1998                | 2623                  |                                      |
|                                     |                 |                           |         |                    |                  |               |                                                 | 1999                | 3785                  |                                      |
|                                     |                 |                           |         |                    |                  |               |                                                 | 2000                | 4233                  |                                      |
|                                     |                 |                           |         |                    |                  |               |                                                 | 2001                | 4368                  |                                      |
|                                     |                 |                           |         |                    |                  |               |                                                 | 2002                | 4922                  |                                      |
|                                     |                 |                           |         |                    |                  |               |                                                 | 2003                | 3463                  |                                      |
|                                     |                 |                           |         |                    |                  |               |                                                 | 2004                | 3202                  |                                      |
|                                     |                 |                           |         |                    |                  |               |                                                 | 2005                | 4107                  |                                      |
| <b>213</b>                          | YRKPH - York    | Temperate North Atlantic  | USA     | 1984               | 2005             | <1000ha       | -0.05                                           | 1984                | 179                   | [39]                                 |
|                                     |                 |                           |         |                    |                  |               |                                                 | 1985                | 176                   |                                      |
|                                     |                 |                           |         |                    |                  |               |                                                 | 1986                | 173                   |                                      |
|                                     |                 |                           |         |                    |                  |               |                                                 | 1987                | 190                   |                                      |
|                                     |                 |                           |         |                    |                  |               |                                                 | 1989                | 233                   |                                      |
|                                     |                 |                           |         |                    |                  |               |                                                 | 1990                | 272                   |                                      |
|                                     |                 |                           |         |                    |                  |               |                                                 | 1991                | 267                   |                                      |
|                                     |                 |                           |         |                    |                  |               |                                                 | 1992                | 274                   |                                      |
|                                     |                 |                           |         |                    |                  |               |                                                 | 1993                | 282                   |                                      |

| Site reference number<br>(database) | Site name            | Global seagrass bioregion | Country | Year study started | Year study ended | Area category | Specific rate of change, $\mu$<br>(% $y^{-1}$ ) | Year of data record | Area recorded<br>(Ha) | Data source<br>(publication number*) |
|-------------------------------------|----------------------|---------------------------|---------|--------------------|------------------|---------------|-------------------------------------------------|---------------------|-----------------------|--------------------------------------|
|                                     |                      |                           |         |                    |                  |               |                                                 | 1994                | 296                   |                                      |
|                                     |                      |                           |         |                    |                  |               |                                                 | 1995                | 302                   |                                      |
|                                     |                      |                           |         |                    |                  |               |                                                 | 1996                | 307                   |                                      |
|                                     |                      |                           |         |                    |                  |               |                                                 | 1997                | 339                   |                                      |
|                                     |                      |                           |         |                    |                  |               |                                                 | 1998                | 303                   |                                      |
|                                     |                      |                           |         |                    |                  |               |                                                 | 1999                | 265                   |                                      |
|                                     |                      |                           |         |                    |                  |               |                                                 | 2000                | 308                   |                                      |
|                                     |                      |                           |         |                    |                  |               |                                                 | 2001                | 324                   |                                      |
|                                     |                      |                           |         |                    |                  |               |                                                 | 2002                | 373                   |                                      |
|                                     |                      |                           |         |                    |                  |               |                                                 | 2003                | 359                   |                                      |
|                                     |                      |                           |         |                    |                  |               |                                                 | 2004                | 242                   |                                      |
|                                     |                      |                           |         |                    |                  |               |                                                 | 2005                | 177                   |                                      |
| <b>214</b>                          | BIGMH - Big Annessex | Temperate North Atlantic  | USA     | 1984               | 2005             | <100ha        | undefined                                       | 1984                | 0                     | [39]                                 |
|                                     |                      |                           |         |                    |                  |               |                                                 | 1985                | 52                    |                                      |
|                                     |                      |                           |         |                    |                  |               |                                                 | 1986                | 76                    |                                      |
|                                     |                      |                           |         |                    |                  |               |                                                 | 1987                | 26                    |                                      |
|                                     |                      |                           |         |                    |                  |               |                                                 | 1989                | 47                    |                                      |
|                                     |                      |                           |         |                    |                  |               |                                                 | 1990                | 41                    |                                      |
|                                     |                      |                           |         |                    |                  |               |                                                 | 1991                | 75                    |                                      |
|                                     |                      |                           |         |                    |                  |               |                                                 | 1992                | 70                    |                                      |
|                                     |                      |                           |         |                    |                  |               |                                                 | 1993                | 77                    |                                      |
|                                     |                      |                           |         |                    |                  |               |                                                 | 1994                | 64                    |                                      |
|                                     |                      |                           |         |                    |                  |               |                                                 | 1995                | 71                    |                                      |
|                                     |                      |                           |         |                    |                  |               |                                                 | 1996                | 44                    |                                      |
|                                     |                      |                           |         |                    |                  |               |                                                 | 1997                | 59                    |                                      |
|                                     |                      |                           |         |                    |                  |               |                                                 | 1998                | 38                    |                                      |
|                                     |                      |                           |         |                    |                  |               |                                                 | 1999                | 65                    |                                      |
|                                     |                      |                           |         |                    |                  |               |                                                 | 2000                | 84                    |                                      |
|                                     |                      |                           |         |                    |                  |               |                                                 | 2001                | 93                    |                                      |
|                                     |                      |                           |         |                    |                  |               |                                                 | 2002                | 105                   |                                      |
|                                     |                      |                           |         |                    |                  |               |                                                 | 2003                | 63                    |                                      |
|                                     |                      |                           |         |                    |                  |               |                                                 | 2004                | 90                    |                                      |
|                                     |                      |                           |         |                    |                  |               |                                                 | 2005                | 112                   |                                      |

| Site reference number<br>(database) | Site name  | Global seagrass bioregion | Country | Year study started | Year study ended | Area category | Specific rate of change, $\mu$<br>(% $y^{-1}$ ) | Year of data record | Area recorded<br>(Ha) | Data source<br>(publication number*) |
|-------------------------------------|------------|---------------------------|---------|--------------------|------------------|---------------|-------------------------------------------------|---------------------|-----------------------|--------------------------------------|
| 215                                 | East River | Temperate North Atlantic  | USA     | 1937               | 2006             | <1000ha       | -0.68                                           | 1937                | 327.71                | [39]                                 |
|                                     |            |                           |         |                    |                  |               |                                                 | 1953                | 488.71                |                                      |
|                                     |            |                           |         |                    |                  |               |                                                 | 1963                | 428.80                |                                      |
|                                     |            |                           |         |                    |                  |               |                                                 | 1971                | 420.00                |                                      |
|                                     |            |                           |         |                    |                  |               |                                                 | 1974                | 211.43                |                                      |
|                                     |            |                           |         |                    |                  |               |                                                 | 1978                | 239.51                |                                      |
|                                     |            |                           |         |                    |                  |               |                                                 | 1981                | 151.10                |                                      |
|                                     |            |                           |         |                    |                  |               |                                                 | 1984                | 201.18                |                                      |
|                                     |            |                           |         |                    |                  |               |                                                 | 1985                | 177.28                |                                      |
|                                     |            |                           |         |                    |                  |               |                                                 | 1986                | 173.64                |                                      |
|                                     |            |                           |         |                    |                  |               |                                                 | 1987                | 185.41                |                                      |
|                                     |            |                           |         |                    |                  |               |                                                 | 1989                | 225.94                |                                      |
|                                     |            |                           |         |                    |                  |               |                                                 | 1990                | 235.76                |                                      |
|                                     |            |                           |         |                    |                  |               |                                                 | 1991                | 252.62                |                                      |
|                                     |            |                           |         |                    |                  |               |                                                 | 1992                | 267.43                |                                      |
|                                     |            |                           |         |                    |                  |               |                                                 | 1993                | 269.52                |                                      |
|                                     |            |                           |         |                    |                  |               |                                                 | 1994                | 298.50                |                                      |
|                                     |            |                           |         |                    |                  |               |                                                 | 1995                | 303.21                |                                      |
|                                     |            |                           |         |                    |                  |               |                                                 | 1996                | 302.72                |                                      |
|                                     |            |                           |         |                    |                  |               |                                                 | 1997                | 309.05                |                                      |
| 1998                                | 298.35     |                           |         |                    |                  |               |                                                 |                     |                       |                                      |
| 1999                                | 265.92     |                           |         |                    |                  |               |                                                 |                     |                       |                                      |
| 2000                                | 308.89     |                           |         |                    |                  |               |                                                 |                     |                       |                                      |
| 2001                                | 310.33     |                           |         |                    |                  |               |                                                 |                     |                       |                                      |
| 2002                                | 299.02     |                           |         |                    |                  |               |                                                 |                     |                       |                                      |
| 2003                                | 294.67     |                           |         |                    |                  |               |                                                 |                     |                       |                                      |
| 2004                                | 290.74     |                           |         |                    |                  |               |                                                 |                     |                       |                                      |
| 2005                                | 275.29     |                           |         |                    |                  |               |                                                 |                     |                       |                                      |
| 2006                                | 205.20     |                           |         |                    |                  |               |                                                 |                     |                       |                                      |
| 216                                 | Fleets Bay | Temperate North Atlantic  | USA     | 1937               | 2006             | <1000ha       | -0.19                                           | 1937                | 267.86                | [39]                                 |
|                                     |            |                           |         |                    |                  |               |                                                 | 1953                | 296.09                |                                      |
|                                     |            |                           |         |                    |                  |               |                                                 | 1961                | 543.09                |                                      |

| Site reference number<br>(database) | Site name    | Global seagrass bioregion | Country | Year study started | Year study ended | Area category | Specific rate of change, $\mu$<br>(% $y^{-1}$ ) | Year of data record | Area recorded<br>(Ha) | Data source<br>(publication number*) |
|-------------------------------------|--------------|---------------------------|---------|--------------------|------------------|---------------|-------------------------------------------------|---------------------|-----------------------|--------------------------------------|
|                                     |              |                           |         |                    |                  |               |                                                 | 1969                | 523.76                |                                      |
|                                     |              |                           |         |                    |                  |               |                                                 | 1974                | 300.00                |                                      |
|                                     |              |                           |         |                    |                  |               |                                                 | 1978                | 77.31                 |                                      |
|                                     |              |                           |         |                    |                  |               |                                                 | 1981                | 73.04                 |                                      |
|                                     |              |                           |         |                    |                  |               |                                                 | 1984                | 109.40                |                                      |
|                                     |              |                           |         |                    |                  |               |                                                 | 1985                | 90.99                 |                                      |
|                                     |              |                           |         |                    |                  |               |                                                 | 1986                | 94.74                 |                                      |
|                                     |              |                           |         |                    |                  |               |                                                 | 1987                | 154.85                |                                      |
|                                     |              |                           |         |                    |                  |               |                                                 | 1989                | 210.57                |                                      |
|                                     |              |                           |         |                    |                  |               |                                                 | 1990                | 240.27                |                                      |
|                                     |              |                           |         |                    |                  |               |                                                 | 1991                | 239.45                |                                      |
|                                     |              |                           |         |                    |                  |               |                                                 | 1992                | 285.81                |                                      |
|                                     |              |                           |         |                    |                  |               |                                                 | 1993                | 307.46                |                                      |
|                                     |              |                           |         |                    |                  |               |                                                 | 1994                | 302.75                |                                      |
|                                     |              |                           |         |                    |                  |               |                                                 | 1995                | 289.27                |                                      |
|                                     |              |                           |         |                    |                  |               |                                                 | 1996                | 293.91                |                                      |
|                                     |              |                           |         |                    |                  |               |                                                 | 1997                | 271.83                |                                      |
|                                     |              |                           |         |                    |                  |               |                                                 | 1998                | 280.44                |                                      |
|                                     |              |                           |         |                    |                  |               |                                                 | 1999                | 266.24                |                                      |
|                                     |              |                           |         |                    |                  |               |                                                 | 2000                | 291.69                |                                      |
|                                     |              |                           |         |                    |                  |               |                                                 | 2001                | 299.40                |                                      |
|                                     |              |                           |         |                    |                  |               |                                                 | 2002                | 366.08                |                                      |
|                                     |              |                           |         |                    |                  |               |                                                 | 2003                | 239.99                |                                      |
|                                     |              |                           |         |                    |                  |               |                                                 | 2004                | 252.12                |                                      |
|                                     |              |                           |         |                    |                  |               |                                                 | 2005                | 294.76                |                                      |
|                                     |              |                           |         |                    |                  |               |                                                 | 2006                | 234.17                |                                      |
| <b>217</b>                          | Jenkins Neck | Temperate North Atlantic  | USA     | 1937               | 2006             | <1000ha       | -0.46                                           | 1937                | 203.33                | [39]                                 |
|                                     |              |                           |         |                    |                  |               |                                                 | 1951                | 360.26                |                                      |
|                                     |              |                           |         |                    |                  |               |                                                 | 1960                | 364.16                |                                      |
|                                     |              |                           |         |                    |                  |               |                                                 | 1971                | 223.01                |                                      |
|                                     |              |                           |         |                    |                  |               |                                                 | 1974                | 200.00                |                                      |
|                                     |              |                           |         |                    |                  |               |                                                 | 1978                | 129.00                |                                      |
|                                     |              |                           |         |                    |                  |               |                                                 | 1981                | 125.23                |                                      |



| Site reference number<br>(database) | Site name       | Global seagrass bioregion | Country | Year study started | Year study ended | Area category | Specific rate of change, $\mu$<br>(% $y^{-1}$ ) | Year of data record | Area recorded<br>(Ha) | Data source<br>(publication number*) |
|-------------------------------------|-----------------|---------------------------|---------|--------------------|------------------|---------------|-------------------------------------------------|---------------------|-----------------------|--------------------------------------|
|                                     |                 |                           |         |                    |                  |               |                                                 | 1984                | 193.01                |                                      |
|                                     |                 |                           |         |                    |                  |               |                                                 | 1985                | 192.24                |                                      |
|                                     |                 |                           |         |                    |                  |               |                                                 | 1986                | 198.95                |                                      |
|                                     |                 |                           |         |                    |                  |               |                                                 | 1987                | 202.75                |                                      |
|                                     |                 |                           |         |                    |                  |               |                                                 | 1989                | 247.19                |                                      |
|                                     |                 |                           |         |                    |                  |               |                                                 | 1990                | 259.06                |                                      |
|                                     |                 |                           |         |                    |                  |               |                                                 | 1991                | 272.43                |                                      |
|                                     |                 |                           |         |                    |                  |               |                                                 | 1992                | 281.41                |                                      |
|                                     |                 |                           |         |                    |                  |               |                                                 | 1993                | 282.31                |                                      |
|                                     |                 |                           |         |                    |                  |               |                                                 | 1994                | 301.12                |                                      |
|                                     |                 |                           |         |                    |                  |               |                                                 | 1995                | 300.85                |                                      |
|                                     |                 |                           |         |                    |                  |               |                                                 | 1996                | 301.33                |                                      |
|                                     |                 |                           |         |                    |                  |               |                                                 | 1997                | 328.38                |                                      |
|                                     |                 |                           |         |                    |                  |               |                                                 | 1998                | 305.48                |                                      |
|                                     |                 |                           |         |                    |                  |               |                                                 | 1999                | 278.87                |                                      |
|                                     |                 |                           |         |                    |                  |               |                                                 | 2000                | 298.14                |                                      |
|                                     |                 |                           |         |                    |                  |               |                                                 | 2001                | 303.00                |                                      |
|                                     |                 |                           |         |                    |                  |               |                                                 | 2002                | 309.55                |                                      |
|                                     |                 |                           |         |                    |                  |               |                                                 | 2003                | 312.30                |                                      |
|                                     |                 |                           |         |                    |                  |               |                                                 | 2004                | 215.43                |                                      |
|                                     |                 |                           |         |                    |                  |               |                                                 | 2005                | 152.74                |                                      |
|                                     |                 |                           |         |                    |                  |               |                                                 | 2006                | 147.60                |                                      |
| <b>218</b>                          | Vaucluse Shores | Temperate North Atlantic  | USA     | 1938               | 2006             | <1000ha       | -0.99                                           | 1938                | 405.18                | [39]                                 |
|                                     |                 |                           |         |                    |                  |               |                                                 | 1949                | 399.41                |                                      |
|                                     |                 |                           |         |                    |                  |               |                                                 | 1955                | 370.54                |                                      |
|                                     |                 |                           |         |                    |                  |               |                                                 | 1966                | 399.36                |                                      |
|                                     |                 |                           |         |                    |                  |               |                                                 | 1972                | 355.88                |                                      |
|                                     |                 |                           |         |                    |                  |               |                                                 | 1978                | 316.27                |                                      |
|                                     |                 |                           |         |                    |                  |               |                                                 | 1981                | 290.08                |                                      |
|                                     |                 |                           |         |                    |                  |               |                                                 | 1984                | 290.18                |                                      |
|                                     |                 |                           |         |                    |                  |               |                                                 | 1985                | 277.23                |                                      |
|                                     |                 |                           |         |                    |                  |               |                                                 | 1986                | 295.74                |                                      |
|                                     |                 |                           |         |                    |                  |               |                                                 | 1987                | 259.41                |                                      |

| Site reference number<br>(database) | Site name       | Global seagrass bioregion | Country | Year study started | Year study ended | Area category | Specific rate of change, $\mu$<br>(% $y^{-1}$ ) | Year of data record | Area recorded<br>(Ha) | Data source<br>(publication number*) |
|-------------------------------------|-----------------|---------------------------|---------|--------------------|------------------|---------------|-------------------------------------------------|---------------------|-----------------------|--------------------------------------|
|                                     |                 |                           |         |                    |                  |               |                                                 | 1989                | 280.01                |                                      |
|                                     |                 |                           |         |                    |                  |               |                                                 | 1990                | 307.71                |                                      |
|                                     |                 |                           |         |                    |                  |               |                                                 | 1991                | 339.36                |                                      |
|                                     |                 |                           |         |                    |                  |               |                                                 | 1992                | 370.74                |                                      |
|                                     |                 |                           |         |                    |                  |               |                                                 | 1993                | 395.20                |                                      |
|                                     |                 |                           |         |                    |                  |               |                                                 | 1994                | 353.09                |                                      |
|                                     |                 |                           |         |                    |                  |               |                                                 | 1995                | 349.18                |                                      |
|                                     |                 |                           |         |                    |                  |               |                                                 | 1996                | 344.91                |                                      |
|                                     |                 |                           |         |                    |                  |               |                                                 | 1997                | 368.03                |                                      |
|                                     |                 |                           |         |                    |                  |               |                                                 | 1998                | 354.61                |                                      |
|                                     |                 |                           |         |                    |                  |               |                                                 | 1999                | 365.33                |                                      |
|                                     |                 |                           |         |                    |                  |               |                                                 | 2000                | 355.90                |                                      |
|                                     |                 |                           |         |                    |                  |               |                                                 | 2001                | 354.88                |                                      |
|                                     |                 |                           |         |                    |                  |               |                                                 | 2002                | 350.36                |                                      |
|                                     |                 |                           |         |                    |                  |               |                                                 | 2003                | 351.30                |                                      |
|                                     |                 |                           |         |                    |                  |               |                                                 | 2004                | 303.83                |                                      |
|                                     |                 |                           |         |                    |                  |               |                                                 | 2005                | 306.92                |                                      |
|                                     |                 |                           |         |                    |                  |               |                                                 | 2006                | 206.04                |                                      |
| <b>219</b>                          | Parrott Islands | Temperate North Atlantic  | USA     | 1937               | 1971             | <1000ha       | undefined                                       | 1937                | 189.53                | [39]                                 |
|                                     |                 |                           |         |                    |                  |               |                                                 | 1951                | 355.37                |                                      |
|                                     |                 |                           |         |                    |                  |               |                                                 | 1960                | 353.73                |                                      |
|                                     |                 |                           |         |                    |                  |               |                                                 | 1968                | 277.62                |                                      |
|                                     |                 |                           |         |                    |                  |               |                                                 | 1971                | 0.00                  |                                      |
| <b>220</b>                          | Mumfort Islands | Temperate North Atlantic  | USA     | 1937               | 2000             | <1000ha       | -10.97                                          | 1937                | 91.63                 | [39]                                 |
|                                     |                 |                           |         |                    |                  |               |                                                 | 1953                | 241.92                |                                      |
|                                     |                 |                           |         |                    |                  |               |                                                 | 1960                | 213.84                |                                      |
|                                     |                 |                           |         |                    |                  |               |                                                 | 1971                | 200.00                |                                      |
|                                     |                 |                           |         |                    |                  |               |                                                 | 1974                | 5.67                  |                                      |
|                                     |                 |                           |         |                    |                  |               |                                                 | 1990                | 1.48                  |                                      |
|                                     |                 |                           |         |                    |                  |               |                                                 | 2000                | 0.09                  |                                      |
| <b>224</b>                          | Bass River      | Temperate North Atlantic  | USA     | 1994               | 2000             | <10ha         | -26.58                                          | 1994                | 5.86                  | [40]                                 |

| Site reference number<br>(database) | Site name                               | Global seagrass bioregion | Country | Year study started | Year study ended | Area category | Specific rate of change, $\mu$<br>(% $y^{-1}$ ) | Year of data record | Area recorded<br>(Ha) | Data source<br>(publication number*) |
|-------------------------------------|-----------------------------------------|---------------------------|---------|--------------------|------------------|---------------|-------------------------------------------------|---------------------|-----------------------|--------------------------------------|
|                                     |                                         |                           |         |                    |                  |               |                                                 | 2000                | 1.19                  |                                      |
| 225                                 | Beverly Harbor/Danvers River            | Temperate North Atlantic  | USA     | 1995               | 2001             | <10ha         | -9.78                                           | 1995                | 4.11                  | [40]                                 |
|                                     |                                         |                           |         |                    |                  |               |                                                 | 2001                | 2.29                  |                                      |
| 226                                 | Boston Harbor South                     | Temperate North Atlantic  | USA     | 1995               | 2001             | <100ha        | -25.45                                          | 1995                | 73.06                 | [40]                                 |
|                                     |                                         |                           |         |                    |                  |               |                                                 | 2001                | 15.87                 |                                      |
| 227                                 | Bournes Pond                            | Temperate North Atlantic  | USA     | 1994               | 2000             | <100ha        | -8.59                                           | 1994                | 18.91                 | [40]                                 |
|                                     |                                         |                           |         |                    |                  |               |                                                 | 2000                | 11.29                 |                                      |
| 228                                 | Buttermilk and Little Buttermilk Bays   | Temperate North Atlantic  | USA     | 1996               | 2002             | <100ha        | undefined                                       | 1996                | 38.22                 | [40]                                 |
|                                     |                                         |                           |         |                    |                  |               |                                                 | 2002                | 0                     |                                      |
| 229                                 | Cape Pogue Pond\Pochet Pond\Calebs Pond | Temperate North Atlantic  | USA     | 1994               | 1999             | <1000ha       | -4.15                                           | 1994                | 220.43                | [40]                                 |
|                                     |                                         |                           |         |                    |                  |               |                                                 | 1999                | 179.11                |                                      |
| 230                                 | Duxbury/Plymouth Harbors                | Temperate North Atlantic  | USA     | 1995               | 2000             | <1000ha       | -2.71                                           | 1995                | 906.03                | [40]                                 |
|                                     |                                         |                           |         |                    |                  |               |                                                 | 2000                | 791.38                |                                      |
| 232                                 | Gloucester Harbor                       | Temperate North Atlantic  | USA     | 1996               | 2001             | <100ha        | -3.88                                           | 1996                | 18.37                 | [40]                                 |
|                                     |                                         |                           |         |                    |                  |               |                                                 | 2001                | 15.13                 |                                      |
| 234                                 | Herring River                           | Temperate North Atlantic  | USA     | 1994               | 2000             | <10ha         | -13.31                                          | 1994                | 3.40                  | [40]                                 |
|                                     |                                         |                           |         |                    |                  |               |                                                 | 2000                | 1.53                  |                                      |
| 235                                 | Hyannis Harbor                          | Temperate North Atlantic  | USA     | 1994               | 2000             | <100ha        | -4.11                                           | 1994                | 68.35                 | [40]                                 |
|                                     |                                         |                           |         |                    |                  |               |                                                 | 2000                | 53.40                 |                                      |
| 236                                 | Lagoon Pond                             | Temperate North Atlantic  | USA     | 1994               | 1999             | <100ha        | -16.55                                          | 1994                | 66.44                 | [40]                                 |
|                                     |                                         |                           |         |                    |                  |               |                                                 | 1999                | 29.04                 |                                      |

| Site reference number<br>(database) | Site name                             | Global seagrass bioregion | Country | Year study started | Year study ended | Area category | Specific rate of change, $\mu$<br>(% $y^{-1}$ ) | Year of data record | Area recorded<br>(Ha) | Data source<br>(publication number*) |
|-------------------------------------|---------------------------------------|---------------------------|---------|--------------------|------------------|---------------|-------------------------------------------------|---------------------|-----------------------|--------------------------------------|
| 237                                 | Lake Tashmoo                          | Temperate North Atlantic  | USA     | 1994               | 1999             | <100ha        | -17.36                                          | 1994                | 36.92                 | [40]                                 |
|                                     |                                       |                           |         |                    |                  |               |                                                 | 1999                | 15.50                 |                                      |
| 238                                 | Little Pond                           | Temperate North Atlantic  | USA     | 1994               | 2000             | <10ha         | -14.75                                          | 1994                | 5.96                  | [40]                                 |
|                                     |                                       |                           |         |                    |                  |               |                                                 | 2000                | 2.46                  |                                      |
| 239                                 | Lower Pleasant Bay                    | Temperate North Atlantic  | USA     | 1994               | 2000             | <1000ha       | -1.50                                           | 1994                | 513.06                | [40]                                 |
|                                     |                                       |                           |         |                    |                  |               |                                                 | 2000                | 468.93                |                                      |
| 240                                 | Lynn Harbor                           | Temperate North Atlantic  | USA     | 1996               | 2001             | <1000ha       | -2.15                                           | 1996                | 288.70                | [40]                                 |
|                                     |                                       |                           |         |                    |                  |               |                                                 | 2001                | 259.28                |                                      |
| 241                                 | Madaket Harbor                        | Temperate North Atlantic  | USA     | 1994               | 1999             | <1000ha       | -2.10                                           | 1994                | 271.66                | [40]                                 |
|                                     |                                       |                           |         |                    |                  |               |                                                 | 1999                | 244.59                |                                      |
| 242                                 | Manchester Harbor                     | Temperate North Atlantic  | USA     | 1996               | 2001             | <100ha        | -4.11                                           | 1996                | 58.39                 | [40]                                 |
|                                     |                                       |                           |         |                    |                  |               |                                                 | 2001                | 47.53                 |                                      |
| 243                                 | Marblehead Harbor                     | Temperate North Atlantic  | USA     | 1996               | 2001             | <10ha         | -14.04                                          | 1996                | 10.21                 | [40]                                 |
|                                     |                                       |                           |         |                    |                  |               |                                                 | 2001                | 5.06                  |                                      |
| 244                                 | Menemsha Pond                         | Temperate North Atlantic  | USA     | 1994               | 1999             | <1000ha       | -3.66                                           | 1994                | 171.74                | [40]                                 |
|                                     |                                       |                           |         |                    |                  |               |                                                 | 1999                | 143                   |                                      |
| 245                                 | Morris Island                         | Temperate North Atlantic  | USA     | 1994               | 2000             | <100ha        | -2.33                                           | 1994                | 68.57                 | [40]                                 |
|                                     |                                       |                           |         |                    |                  |               |                                                 | 2000                | 59.62                 |                                      |
| 246                                 | Nantucket Harbor                      | Temperate North Atlantic  | USA     | 1994               | 1999             | <1000ha       | -6.44                                           | 1994                | 964.11                | [40]                                 |
|                                     |                                       |                           |         |                    |                  |               |                                                 | 1999                | 698.62                |                                      |
| 247                                 | New Bedford Harbor(Outer)/Clarks Cove | Temperate North Atlantic  | USA     | 1996               | 2002             | <100ha        | -1.97                                           | 1996                | 54.58                 | [40]                                 |
|                                     |                                       |                           |         |                    |                  |               |                                                 | 2002                | 48.50                 |                                      |

| Site reference number<br>(database) | Site name                             | Global seagrass bioregion | Country | Year study started | Year study ended | Area category | Specific rate of change, $\mu$<br>(% $y^{-1}$ ) | Year of data record | Area recorded<br>(Ha) | Data source<br>(publication number*) |
|-------------------------------------|---------------------------------------|---------------------------|---------|--------------------|------------------|---------------|-------------------------------------------------|---------------------|-----------------------|--------------------------------------|
| 248                                 | Ryders Cove/Crow Pond/Bassing Harbor  | Temperate North Atlantic  | USA     | 1994               | 2000             | <100ha        | -4.70                                           | 1994                | 59.29                 | [40]                                 |
|                                     |                                       |                           |         |                    |                  |               |                                                 | 2000                | 44.72                 |                                      |
| 249                                 | Salem Harbor                          | Temperate North Atlantic  | USA     | 1996               | 2001             | <100ha        | -33.43                                          | 1996                | 41.87                 | [40]                                 |
|                                     |                                       |                           |         |                    |                  |               |                                                 | 2001                | 7.87                  |                                      |
| 250                                 | Scituate Harbor                       | Temperate North Atlantic  | USA     | 1995               | 2000             | <10ha         | -3.03                                           | 1995                | 4.77                  | [40]                                 |
|                                     |                                       |                           |         |                    |                  |               |                                                 | 2000                | 4.10                  |                                      |
| 251                                 | Stage Harbor System                   | Temperate North Atlantic  | USA     | 1994               | 2000             | <100ha        | -7.93                                           | 1994                | 104.59                | [40]                                 |
|                                     |                                       |                           |         |                    |                  |               |                                                 | 2000                | 64.99                 |                                      |
| 252                                 | Three Bays                            | Temperate North Atlantic  | USA     | 1994               | 2000             | <10ha         | undefined                                       | 1994                | 4.35                  | [40]                                 |
|                                     |                                       |                           |         |                    |                  |               |                                                 | 2000                | 0.00                  |                                      |
| 253                                 | Upper Pleasant Bay                    | Temperate North Atlantic  | USA     | 1994               | 2000             | <100ha        | -7.67                                           | 1994                | 120.82                | [40]                                 |
|                                     |                                       |                           |         |                    |                  |               |                                                 | 2000                | 76.24                 |                                      |
| 255                                 | Wareham River/Marks Cove              | Temperate North Atlantic  | USA     | 1996               | 2002             | <10ha         | -23.83                                          | 1996                | 4.39                  | [40]                                 |
|                                     |                                       |                           |         |                    |                  |               |                                                 | 2002                | 1.05                  |                                      |
| 256                                 | West Falmouth Harbor                  | Temperate North Atlantic  | USA     | 1996               | 2002             | <100ha        | -1.24                                           | 1996                | 21.92                 | [40]                                 |
|                                     |                                       |                           |         |                    |                  |               |                                                 | 2002                | 20.35                 |                                      |
| 257                                 | Westport River - East and West Branch | Temperate North Atlantic  | USA     | 1996               | 2002             | <1000ha       | -6.19                                           | 1996                | 273.05                | [40]                                 |
|                                     |                                       |                           |         |                    |                  |               |                                                 | 2002                | 188.36                |                                      |
| 258                                 | Weweantic River                       | Temperate North Atlantic  | USA     | 1996               | 2002             | <100ha        | -14.16                                          | 1996                | 20.63                 | [40]                                 |
|                                     |                                       |                           |         |                    |                  |               |                                                 | 2002                | 8.82                  |                                      |
| 259                                 | Wild Harbor                           | Temperate                 | USA     | 1996               | 2002             | <10ha         | -2.16                                           | 1996                | 8.06                  | [40]                                 |

| Site reference number<br>(database) | Site name           | Global seagrass bioregion | Country | Year study started | Year study ended | Area category | Specific rate of change, $\mu$<br>(% $y^{-1}$ ) | Year of data record | Area recorded<br>(Ha) | Data source<br>(publication number*) |
|-------------------------------------|---------------------|---------------------------|---------|--------------------|------------------|---------------|-------------------------------------------------|---------------------|-----------------------|--------------------------------------|
|                                     |                     | North Atlantic            |         |                    |                  |               |                                                 | 2002                | 7.08                  |                                      |
| 260                                 | Boston Harbor North | Temperate North Atlantic  | USA     | 1995               | 2001             | <10ha         | undefined                                       | 1995                | 0.00                  | [40]                                 |
|                                     |                     |                           |         |                    |                  |               |                                                 | 2001                | 11.10                 |                                      |
| 261                                 | Cohasset Harbor     | Temperate North Atlantic  | USA     | 1995               | 2001             | <100ha        | 0.52                                            | 1995                | 45.56                 | [40]                                 |
|                                     |                     |                           |         |                    |                  |               |                                                 | 2001                | 47                    |                                      |
| 262                                 | Lewis Bay           | Temperate North Atlantic  | USA     | 1995               | 2001             | <1ha          | 18.12                                           | 1995                | 0.16                  | [40]                                 |
|                                     |                     |                           |         |                    |                  |               |                                                 | 2001                | 0.48                  |                                      |
| 271                                 | Coastal Bend        | Tropical Atlantic         | USA     | 1958               | 1994             | >1000ha       | 0.20                                            | 1958                | 10584                 | [41]                                 |
|                                     |                     |                           |         |                    |                  |               |                                                 | 1994                | 11385                 |                                      |
| 272                                 | Galveston Bay       | Tropical Atlantic         | USA     | 1956               | 1998             | >1000ha       | -5.40                                           | 1956                | 2025                  | [41]                                 |
|                                     |                     |                           |         |                    |                  |               |                                                 | 1998                | 210                   |                                      |
| 273                                 | Chandeleur Islands  | Tropical Atlantic         | USA     | 1969               | 1995             | >1000ha       | -1.33                                           | 1969                | 6377                  | [41]                                 |
|                                     |                     |                           |         |                    |                  |               |                                                 | 1969                | 4669                  |                                      |
|                                     |                     |                           |         |                    |                  |               |                                                 | 1992                | 6536                  |                                      |
|                                     |                     |                           |         |                    |                  |               |                                                 | 1995                | 4511                  |                                      |
| 274                                 | Mississippi Sound   | Tropical Atlantic         | USA     | 1992               | 2003             | <1000ha       | -6.36                                           | 1992                | 600                   | [41]                                 |
|                                     |                     |                           |         |                    |                  |               |                                                 | 2003                | 298                   |                                      |
| 275                                 | Mobile Bay          | Tropical Atlantic         | USA     | 1981               | 2003             | <1000ha       | -7.77                                           | 1981                | 1105                  | [41]                                 |
|                                     |                     |                           |         |                    |                  |               |                                                 | 2003                | 200                   |                                      |
| 276                                 | Perdido Bay         | Tropical Atlantic         | USA     | 1940               | 2003             | <1000ha       | -2.18                                           | 1940                | 475                   | [41]                                 |
|                                     |                     |                           |         |                    |                  |               |                                                 | 2003                | 120                   |                                      |
| 277                                 | Pensacola Bay       | Tropical Atlantic         | USA     | 1960               | 1992             | >1000ha       | -2.31                                           | 1968                | 3800                  | [41]                                 |
|                                     |                     |                           |         |                    |                  |               |                                                 | 1992                | 1814                  |                                      |

| Site reference number<br>(database) | Site name                | Global seagrass bioregion | Country   | Year study started | Year study ended | Area category | Specific rate of change, $\mu$<br>(% $y^{-1}$ ) | Year of data record | Area recorded<br>(Ha) | Data source<br>(publication number*) |
|-------------------------------------|--------------------------|---------------------------|-----------|--------------------|------------------|---------------|-------------------------------------------------|---------------------|-----------------------|--------------------------------------|
| 278                                 | Choctawhatchee Bay       | Tropical Atlantic         | USA       | 1983               | 1992             | >1000ha       | 3.68                                            | 1983                | 1237                  | [41]                                 |
|                                     |                          |                           |           |                    |                  |               |                                                 | 1992                | 1722                  |                                      |
| 279                                 | St. Andrew Bay           | Tropical Atlantic         | USA       | 1964               | 1992             | >1000ha       | -0.60                                           | 1964                | 4706                  | [41]                                 |
|                                     |                          |                           |           |                    |                  |               |                                                 | 1992                | 3979                  |                                      |
| 280                                 | Big Bend                 | Tropical Atlantic         | USA       | 1984               | 1992             | >1000ha       | -9.15                                           | 1984                | 520000                | [41]                                 |
|                                     |                          |                           |           |                    |                  |               |                                                 | 1992                | 250000                |                                      |
| 283                                 | Greater Charlotte Harbor | Tropical Atlantic         | USA       | 1982               | 1999             | >1000ha       | -0.35                                           | 1982                | 23127                 | [41]                                 |
|                                     |                          |                           |           |                    |                  |               |                                                 | 1999                | 21802                 |                                      |
| 284                                 | Florida Bay              | Tropical Atlantic         | USA       | 1987               | 1994             | >1000ha       | -1.89                                           | 1987                | 142473                | [41]                                 |
|                                     |                          |                           |           |                    |                  |               |                                                 | 1994                | 124787                |                                      |
| 285                                 | Cartegena Bay            | Tropical Atlantic         | Colombia  | 1945               | 2001             | <1000ha       | -4.28                                           | 1945                | 834.34                | [42]                                 |
|                                     |                          |                           |           |                    |                  |               |                                                 | 1956                | 253.50                |                                      |
|                                     |                          |                           |           |                    |                  |               |                                                 | 1972                | 150.09                |                                      |
|                                     |                          |                           |           |                    |                  |               |                                                 | 1991                | 93.80                 |                                      |
|                                     |                          |                           |           |                    |                  |               |                                                 | 2001                | 76                    |                                      |
| 286                                 | Rocky Bay                | Temperate Southern Oceans | Australia | 1941               | 1992             | <100ha        | -0.38                                           | 1941                | 20.44                 | [43]                                 |
|                                     |                          |                           |           |                    |                  |               |                                                 | 1972                | 19.63                 |                                      |
|                                     |                          |                           |           |                    |                  |               |                                                 | 1981                | 19.50                 |                                      |
|                                     |                          |                           |           |                    |                  |               |                                                 | 1992                | 16.83                 |                                      |
|                                     |                          |                           |           |                    |                  |               |                                                 |                     |                       |                                      |
| 287                                 | Thomson Bay South        | Temperate Southern Oceans | Australia | 1966               | 1992             | <100ha        | -0.08                                           | 1966                | 34.02                 | [43]                                 |
|                                     |                          |                           |           |                    |                  |               |                                                 | 1992                | 33.34                 |                                      |
| 288                                 | Thomson Bay North        | Temperate Southern Oceans | Australia | 1966               | 1992             | <10ha         | -0.16                                           | 1966                | 10.12                 | [43]                                 |

| Site reference number<br>(database) | Site name             | Global seagrass bioregion | Country         | Year study started | Year study ended | Area category | Specific rate of change, $\mu$<br>(% $y^{-1}$ ) | Year of data record | Area recorded<br>(Ha) | Data source<br>(publication number*) |
|-------------------------------------|-----------------------|---------------------------|-----------------|--------------------|------------------|---------------|-------------------------------------------------|---------------------|-----------------------|--------------------------------------|
|                                     |                       |                           |                 |                    |                  |               |                                                 | 1992                | 9.70                  |                                      |
| 289                                 | De Keeg-De Ans        | Temperate North Atlantic  | The Netherlands | 1972               | 1987             | <100ha        | 2.85                                            | 1972                | 15                    | [44]                                 |
|                                     |                       |                           |                 |                    |                  |               |                                                 | 1987                | 23                    |                                      |
| 290                                 | Hoorn                 | Temperate North Atlantic  | The Netherlands | 1972               | 1987             | <100ha        | -2.09                                           | 1972                | 115                   | [44]                                 |
|                                     |                       |                           |                 |                    |                  |               |                                                 | 1987                | 84                    |                                      |
| 291                                 | Linthorst Homanpolder | Temperate North Atlantic  | The Netherlands | 1972               | 1987             | <100ha        | undefined                                       | 1972                | 0.00                  | [44]                                 |
|                                     |                       |                           |                 |                    |                  |               |                                                 | 1987                | 75                    |                                      |
| 292                                 | Emmapolder            | Temperate North Atlantic  | The Netherlands | 1972               | 1987             | <100ha        | undefined                                       | 1972                | 0.00                  | [44]                                 |
|                                     |                       |                           |                 |                    |                  |               |                                                 | 1987                | 77                    |                                      |
| 293                                 | Balgzand              | Temperate North Atlantic  | The Netherlands | 1972               | 1987             | <10ha         | -16.57                                          | 1972                | 12                    | [44]                                 |
|                                     |                       |                           |                 |                    |                  |               |                                                 | 1987                | 1                     |                                      |
| 330                                 | St Georges Basin      | Temperate Southern Oceans | Australia       | 1961               | 1998             | <1000ha       | -0.70                                           | 1957                | 377.90                | [45]                                 |
|                                     |                       |                           |                 |                    |                  |               |                                                 | 1970                | 343.40                |                                      |
|                                     |                       |                           |                 |                    |                  |               |                                                 | 1979                | 351.70                |                                      |
|                                     |                       |                           |                 |                    |                  |               |                                                 | 1998                | 292                   |                                      |
| 331                                 | Wagonga Inlet         | Temperate Southern Oceans | Australia       | 1957               | 1994             | <100ha        | -0.29                                           | 1957                | 83.50                 | [45]                                 |
|                                     |                       |                           |                 |                    |                  |               |                                                 | 1982                | 84.80                 |                                      |
|                                     |                       |                           |                 |                    |                  |               |                                                 | 1999                | 75.10                 |                                      |
| 332                                 | Bermagui River        | Temperate Southern Oceans | Australia       | 1957               | 1998             | <100ha        | -1.03                                           | 1957                | 42.90                 | [45]                                 |
|                                     |                       |                           |                 |                    |                  |               |                                                 | 1979                | 28.80                 |                                      |
|                                     |                       |                           |                 |                    |                  |               |                                                 | 1998                | 28.10                 |                                      |
| 333                                 | Merimbula Lake        | Temperate Southern        | Australia       | 1948               | 1994             | <1000ha       | -0.58                                           | 1948                | 200.90                | [46]                                 |



| Site reference number<br>(database) | Site name          | Global seagrass bioregion | Country     | Year study started | Year study ended | Area category | Specific rate of change, $\mu$<br>(% $y^{-1}$ ) | Year of data record | Area recorded<br>(Ha) | Data source<br>(publication number*) |
|-------------------------------------|--------------------|---------------------------|-------------|--------------------|------------------|---------------|-------------------------------------------------|---------------------|-----------------------|--------------------------------------|
|                                     |                    | Oceans                    |             |                    |                  |               |                                                 | 1962                | 226.00                |                                      |
|                                     |                    |                           |             |                    |                  |               |                                                 | 1972                | 192.80                |                                      |
|                                     |                    |                           |             |                    |                  |               |                                                 | 1977                | 185.80                |                                      |
|                                     |                    |                           |             |                    |                  |               |                                                 | 1994                | 153.70                |                                      |
| <b>334</b>                          | Pambula Lake       | Temperate Southern Oceans | Australia   | 1948               | 1994             | <100ha        | -0.43                                           | 1948                | 73.20                 | [46]                                 |
|                                     |                    |                           |             |                    |                  |               |                                                 | 1972                | 59.90                 |                                      |
|                                     |                    |                           |             |                    |                  |               |                                                 | 1994                | 60.20                 |                                      |
| <b>335</b>                          | Sweden west coast  | Temperate North Atlantic  | Sweden      | 1980               | 2000             | >1000ha       | -4.34                                           | 1980                | 2000                  | [47]                                 |
|                                     |                    |                           |             |                    |                  |               |                                                 | 2000                | 840                   |                                      |
| <b>339</b>                          | Glenan Archipelago | Temperate North Atlantic  | France      | 1990               | 2000             | <1000ha       | 4.70                                            | 1990                | 250                   | [48]                                 |
|                                     |                    |                           |             |                    |                  |               |                                                 | 2000                | 400                   |                                      |
| <b>340</b>                          | Medes Islands      | Mediterranean             | Spain       | 1984               | 2001             | <10ha         | 0.00                                            | 1984                | 9                     | [49]                                 |
|                                     |                    |                           |             |                    |                  |               |                                                 | 1994                | 9                     |                                      |
|                                     |                    |                           |             |                    |                  |               |                                                 | 2001                | 9                     |                                      |
| <b>342</b>                          | Green Island       | Tropical Indo-Pacific     | Australia   | 1936               | 1997             | <100ha        | 6.68                                            | 1936                | 0.39                  | [50]                                 |
|                                     |                    |                           |             |                    |                  |               |                                                 | 1959                | 1.10                  |                                      |
|                                     |                    |                           |             |                    |                  |               |                                                 | 1972                | 6.50                  |                                      |
|                                     |                    |                           |             |                    |                  |               |                                                 | 1992                | 15.31                 |                                      |
|                                     |                    |                           |             |                    |                  |               |                                                 | 1993                | 22.70                 |                                      |
|                                     |                    |                           |             |                    |                  |               |                                                 | 1994                | 22.90                 |                                      |
|                                     |                    |                           |             |                    |                  |               |                                                 | 1997                | 23                    |                                      |
| <b>343</b>                          | Tauranga Harbour   | Temperate Southern Oceans | New Zealand | 1959               | 1996             | >1000ha       | -2.92                                           | 1959                | 8617.65               | [51]                                 |
|                                     |                    |                           |             |                    |                  |               |                                                 | 1996                | 2930                  |                                      |
| <b>344</b>                          | Kaduk Island       | Temperate North Pacific   | Korea       | 1980               | 1990             | <1000ha       | undefined                                       | 1980                | 1360                  | [52]                                 |
|                                     |                    |                           |             |                    |                  |               |                                                 | 1990                | 0                     |                                      |

| Site reference number<br>(database) | Site name                            | Global seagrass bioregion | Country | Year study started | Year study ended | Area category | Specific rate of change, $\mu$<br>(% $y^{-1}$ ) | Year of data record | Area recorded<br>(Ha) | Data source<br>(publication number*) |
|-------------------------------------|--------------------------------------|---------------------------|---------|--------------------|------------------|---------------|-------------------------------------------------|---------------------|-----------------------|--------------------------------------|
| 346                                 | Mississippi Bays                     | Tropical Atlantic         | USA     | 1969               | 1992             | >1000ha       | -9.65                                           | 1969                | 5520                  | [53]                                 |
|                                     |                                      |                           |         |                    |                  |               |                                                 | 1992                | 600                   |                                      |
| 350                                 | Upper Laguna Madre                   | Tropical Atlantic         | USA     | 1967               | 1999             | >1000ha       | 1.86                                            | 1967                | 11800                 | [53]                                 |
|                                     |                                      |                           |         |                    |                  |               |                                                 | 1988                | 24900                 |                                      |
|                                     |                                      |                           |         |                    |                  |               |                                                 | 1999                | 21400                 |                                      |
| 353                                 | Lemon Bay                            | Tropical Atlantic         | USA     | 1988               | 2003             | >1000ha       | 0.34                                            | 1988                | 1055                  | [54]                                 |
|                                     |                                      |                           |         |                    |                  |               |                                                 | 1994                | 1067                  |                                      |
|                                     |                                      |                           |         |                    |                  |               |                                                 | 1996                | 1054                  |                                      |
|                                     |                                      |                           |         |                    |                  |               |                                                 | 1999                | 1049                  |                                      |
|                                     |                                      |                           |         |                    |                  |               |                                                 | 2001                | 1046                  |                                      |
|                                     |                                      |                           |         |                    |                  |               |                                                 | 2003                | 1110                  |                                      |
| 354                                 | Placida, Upper Charlotte Harbor      | Tropical Atlantic         | USA     | 1982               | 2003             | >1000ha       | 2.52                                            | 1982                | 957                   | [54]                                 |
|                                     |                                      |                           |         |                    |                  |               |                                                 | 1988                | 1416                  |                                      |
|                                     |                                      |                           |         |                    |                  |               |                                                 | 1992                | 1384                  |                                      |
|                                     |                                      |                           |         |                    |                  |               |                                                 | 1994                | 1344                  |                                      |
|                                     |                                      |                           |         |                    |                  |               |                                                 | 1996                | 1460                  |                                      |
|                                     |                                      |                           |         |                    |                  |               |                                                 | 1999                | 1503                  |                                      |
|                                     |                                      |                           |         |                    |                  |               |                                                 | 2001                | 1531                  |                                      |
| 2003                                | 1625                                 |                           |         |                    |                  |               |                                                 |                     |                       |                                      |
| 355                                 | South Harbor, Upper Charlotte Harbor | Tropical Atlantic         | USA     | 1982               | 2003             | >1000ha       | -0.08                                           | 1982                | 3544                  | [54]                                 |
|                                     |                                      |                           |         |                    |                  |               |                                                 | 1988                | 3710                  |                                      |
|                                     |                                      |                           |         |                    |                  |               |                                                 | 1992                | 3662                  |                                      |
|                                     |                                      |                           |         |                    |                  |               |                                                 | 1994                | 3659                  |                                      |
|                                     |                                      |                           |         |                    |                  |               |                                                 | 1996                | 3648                  |                                      |
|                                     |                                      |                           |         |                    |                  |               |                                                 | 1999                | 3340                  |                                      |
|                                     |                                      |                           |         |                    |                  |               |                                                 | 2001                | 3313                  |                                      |
| 2003                                | 3488                                 |                           |         |                    |                  |               |                                                 |                     |                       |                                      |
| 356                                 | West Wall, Upper                     | Tropical                  | USA     | 1982               | 2003             | <1000ha       | -0.14                                           | 1982                | 665                   | [54]                                 |

| Site reference number<br>(database) | Site name                             | Global seagrass bioregion | Country | Year study started | Year study ended | Area category | Specific rate of change, $\mu$<br>(% $y^{-1}$ ) | Year of data record | Area recorded<br>(Ha) | Data source<br>(publication number*) |
|-------------------------------------|---------------------------------------|---------------------------|---------|--------------------|------------------|---------------|-------------------------------------------------|---------------------|-----------------------|--------------------------------------|
|                                     | Charlotte Harbor                      | Atlantic                  |         |                    |                  |               |                                                 | 1988                | 580                   |                                      |
|                                     |                                       |                           |         |                    |                  |               |                                                 | 1992                | 490                   |                                      |
|                                     |                                       |                           |         |                    |                  |               |                                                 | 1994                | 671                   |                                      |
|                                     |                                       |                           |         |                    |                  |               |                                                 | 1996                | 790                   |                                      |
|                                     |                                       |                           |         |                    |                  |               |                                                 | 1999                | 699                   |                                      |
|                                     |                                       |                           |         |                    |                  |               |                                                 | 2001                | 699                   |                                      |
|                                     |                                       |                           |         |                    |                  |               |                                                 | 2003                | 646                   |                                      |
| <b>357</b>                          | East Wall, Upper Charlotte Harbor     | Tropical Atlantic         | USA     | 1982               | 2003             | >1000ha       | -0.78                                           | 1982                | 1548                  | [54]                                 |
|                                     |                                       |                           |         |                    |                  |               |                                                 | 1988                | 1372                  |                                      |
|                                     |                                       |                           |         |                    |                  |               |                                                 | 1992                | 1361                  |                                      |
|                                     |                                       |                           |         |                    |                  |               |                                                 | 1994                | 1416                  |                                      |
|                                     |                                       |                           |         |                    |                  |               |                                                 | 1996                | 1371                  |                                      |
|                                     |                                       |                           |         |                    |                  |               |                                                 | 1999                | 1452                  |                                      |
|                                     |                                       |                           |         |                    |                  |               |                                                 | 2001                | 1454                  |                                      |
|                                     |                                       |                           |         |                    |                  |               |                                                 | 2003                | 1315                  |                                      |
| <b>358</b>                          | Middle Harbor, Upper Charlotte Harbor | Tropical Atlantic         | USA     | 1982               | 2003             | <100ha        | -2.32                                           | 1982                | 70                    | [54]                                 |
|                                     |                                       |                           |         |                    |                  |               |                                                 | 1988                | 50                    |                                      |
|                                     |                                       |                           |         |                    |                  |               |                                                 | 1992                | 50                    |                                      |
|                                     |                                       |                           |         |                    |                  |               |                                                 | 1994                | 60                    |                                      |
|                                     |                                       |                           |         |                    |                  |               |                                                 | 1996                | 76                    |                                      |
|                                     |                                       |                           |         |                    |                  |               |                                                 | 1999                | 62                    |                                      |
|                                     |                                       |                           |         |                    |                  |               |                                                 | 2001                | 64                    |                                      |
|                                     |                                       |                           |         |                    |                  |               |                                                 | 2003                | 43                    |                                      |
| <b>359</b>                          | Myakka River, Upper Charlotte Harbor  | Tropical Atlantic         | USA     | 1982               | 2003             | <1000ha       | -2.92                                           | 1982                | 218                   | [54]                                 |
|                                     |                                       |                           |         |                    |                  |               |                                                 | 1988                | 161                   |                                      |
|                                     |                                       |                           |         |                    |                  |               |                                                 | 1992                | 130                   |                                      |
|                                     |                                       |                           |         |                    |                  |               |                                                 | 1994                | 189                   |                                      |
|                                     |                                       |                           |         |                    |                  |               |                                                 | 1996                | 203                   |                                      |

| Site reference number<br>(database) | Site name                                    | Global seagrass bioregion | Country | Year study started | Year study ended | Area category | Specific rate of change, $\mu$<br>(% $y^{-1}$ ) | Year of data record | Area recorded<br>(Ha) | Data source<br>(publication number*) |
|-------------------------------------|----------------------------------------------|---------------------------|---------|--------------------|------------------|---------------|-------------------------------------------------|---------------------|-----------------------|--------------------------------------|
|                                     |                                              |                           |         |                    |                  |               |                                                 | 1999                | 191                   |                                      |
|                                     |                                              |                           |         |                    |                  |               |                                                 | 2001                | 185                   |                                      |
|                                     |                                              |                           |         |                    |                  |               |                                                 | 2003                | 118                   |                                      |
| <b>360</b>                          | Peace River, Upper Charlotte Harbor          | Tropical Atlantic         | USA     | 1982               | 2003             | <1000ha       | -6.29                                           | 1982                | 397                   | [54]                                 |
|                                     |                                              |                           |         |                    |                  |               |                                                 | 1988                | 158                   |                                      |
|                                     |                                              |                           |         |                    |                  |               |                                                 | 1992                | 167                   |                                      |
|                                     |                                              |                           |         |                    |                  |               |                                                 | 1994                | 196                   |                                      |
|                                     |                                              |                           |         |                    |                  |               |                                                 | 1996                | 232                   |                                      |
|                                     |                                              |                           |         |                    |                  |               |                                                 | 1999                | 109                   |                                      |
|                                     |                                              |                           |         |                    |                  |               |                                                 | 2001                | 138                   |                                      |
|                                     |                                              |                           |         |                    |                  |               |                                                 | 2003                | 106                   |                                      |
| <b>361</b>                          | Pine Island Sound, Lower Charlotte Harbor    | Tropical Atlantic         | USA     | 1982               | 2002             | >1000ha       | 0.39                                            | 1982                | 9857                  | [54]                                 |
|                                     |                                              |                           |         |                    |                  |               |                                                 | 1999                | 10483                 |                                      |
|                                     |                                              |                           |         |                    |                  |               |                                                 | 2002                | 10647                 |                                      |
| <b>362</b>                          | Matlacha Pass, Lower Charlotte Harbor        | Tropical Atlantic         | USA     | 1982               | 2002             | >1000ha       | -0.77                                           | 1982                | 3247                  | [54]                                 |
|                                     |                                              |                           |         |                    |                  |               |                                                 | 1999                | 2456                  |                                      |
|                                     |                                              |                           |         |                    |                  |               |                                                 | 2002                | 2784                  |                                      |
| <b>363</b>                          | San Carlos Bay, Lower Charlotte Harbor       | Tropical Atlantic         | USA     | 1982               | 2002             | >1000ha       | -1.57                                           | 1989                | 2420                  | [54]                                 |
|                                     |                                              |                           |         |                    |                  |               |                                                 | 1999                | 1504                  |                                      |
|                                     |                                              |                           |         |                    |                  |               |                                                 | 2002                | 1768                  |                                      |
| <b>364</b>                          | Caloosahatchee River, Lower Charlotte Harbor | Tropical Atlantic         | USA     | 1982               | 2002             | <100ha        | -8.76                                           | 1989                | 242                   | [54]                                 |
|                                     |                                              |                           |         |                    |                  |               |                                                 | 1999                | 1                     |                                      |
|                                     |                                              |                           |         |                    |                  |               |                                                 | 2002                | 42                    |                                      |
| <b>365</b>                          | Estero Bay                                   | Tropical                  | USA     | 1999               | 2002             | <1000ha       | -1.11                                           | 1999                | 1008                  | [54]                                 |

| Site reference number<br>(database) | Site name      | Global seagrass bioregion | Country | Year study started | Year study ended | Area category | Specific rate of change, $\mu$<br>(% $y^{-1}$ ) | Year of data record          | Area recorded<br>(Ha) | Data source<br>(publication number*) |
|-------------------------------------|----------------|---------------------------|---------|--------------------|------------------|---------------|-------------------------------------------------|------------------------------|-----------------------|--------------------------------------|
|                                     |                | Atlantic                  |         |                    |                  |               |                                                 | 2002                         | 975                   |                                      |
| 395                                 | Seabrook Shore | Tropical Atlantic         | USA     | 1956               | 1987             | <100ha        | undefined                                       | 1956<br>1965<br>1975<br>1987 | 86<br>0<br>0<br>0     | [55]                                 |
| 396                                 | West Bay       | Tropical Atlantic         | USA     | 1956               | 1987             | <1000ha       | undefined                                       | 1956<br>1965<br>1975<br>1987 | 458<br>117<br>37<br>0 | [55]                                 |
| 397                                 | Christmas Bay  | Tropical Atlantic         | USA     | 1975               | 1987             | <100ha        | -1.92                                           | 1975<br>1987                 | 97<br>77              | [55]                                 |
| 398                                 | Christmas Bay  | Tropical Atlantic         | USA     | 1971               | 1987             | <1000ha       | -9.32                                           | 1971<br>1987                 | 502<br>113            | [56]                                 |
| 399                                 | West Bay       | Tropical Atlantic         | USA     | 1971               | 1987             | <1000ha       | undefined                                       | 1971<br>1987                 | 202.20<br>0           | [56]                                 |
| 400                                 | Bastrop Bay    | Tropical Atlantic         | USA     | 1971               | 1987             | <100ha        | undefined                                       | 1971<br>1987                 | 104.90<br>0           | [56]                                 |
| 401                                 | East Matagorda | Tropical Atlantic         | USA     | 1971               | 1987             | <1000ha       | 2.51                                            | 1971<br>1987                 | 258.90<br>387         | [56]                                 |
| 402                                 | Redfish Lake   | Tropical Atlantic         | USA     | 1971               | 1987             | <100ha        | undefined                                       | 1971<br>1987                 | 0<br>62.80            | [56]                                 |
| 403                                 | Keller         | Tropical Atlantic         | USA     | 1971               | 1987             | <1000ha       | -5.62                                           | 1971<br>1987                 | 168.30<br>68.50       | [56]                                 |
| 404                                 | Matagorda      | Tropical                  | USA     | 1971               | 1987             | <1000ha       | -0.93                                           | 1971                         | 569.60                | [56]                                 |

| Site reference number<br>(database) | Site name       | Global seagrass bioregion | Country | Year study started | Year study ended | Area category | Specific rate of change, $\mu$<br>(% $y^{-1}$ ) | Year of data record | Area recorded<br>(Ha) | Data source<br>(publication number*) |
|-------------------------------------|-----------------|---------------------------|---------|--------------------|------------------|---------------|-------------------------------------------------|---------------------|-----------------------|--------------------------------------|
|                                     |                 | Atlantic                  |         |                    |                  |               |                                                 | 1987                | 491                   |                                      |
| 405                                 | Salt Lake       | Tropical Atlantic         | USA     | 1971               | 1987             | <100ha        | undefined                                       | 1971                | 0                     | [56]                                 |
|                                     |                 |                           |         |                    |                  |               |                                                 | 1987                | 50.80                 |                                      |
| 406                                 | Powderhorn Lake | Tropical Atlantic         | USA     | 1971               | 1987             | <100ha        | undefined                                       | 1971                | 0                     | [56]                                 |
|                                     |                 |                           |         |                    |                  |               |                                                 | 1987                | 20.50                 |                                      |
| 407                                 | Tres Palacios   | Tropical Atlantic         | USA     | 1971               | 1987             | <10ha         | undefined                                       | 1971                | 0                     | [56]                                 |
|                                     |                 |                           |         |                    |                  |               |                                                 | 1987                | 15.60                 |                                      |
| 408                                 | Funter Bay      | Temperate North Pacific   | USA     | 2001               | 2003             | <10ha         | -11.47                                          | 2001                | 7.90                  | [57]                                 |
|                                     |                 |                           |         |                    |                  |               |                                                 | 2002                | 7.24                  |                                      |
|                                     |                 |                           |         |                    |                  |               |                                                 | 2003                | 6.28                  |                                      |
| 409                                 | Crab Bay        | Temperate North Pacific   | USA     | 2001               | 2003             | <10ha         | 3.29                                            | 2001                | 1.63                  | [57]                                 |
|                                     |                 |                           |         |                    |                  |               |                                                 | 2002                | 1.78                  |                                      |
|                                     |                 |                           |         |                    |                  |               |                                                 | 2003                | 1.74                  |                                      |
| 410                                 | Chaik Bay       | Temperate North Pacific   | USA     | 2001               | 2003             | <1ha          | -2.14                                           | 2001                | 0.10                  | [57]                                 |
|                                     |                 |                           |         |                    |                  |               |                                                 | 2002                | 0.09                  |                                      |
|                                     |                 |                           |         |                    |                  |               |                                                 | 2003                | 0.10                  |                                      |
| 411                                 | Nakwasina       | Temperate North Pacific   | USA     | 2001               | 2003             | <1ha          | 5.35                                            | 2001                | 0.52                  | [57]                                 |
|                                     |                 |                           |         |                    |                  |               |                                                 | 2002                | 0.46                  |                                      |
|                                     |                 |                           |         |                    |                  |               |                                                 | 2003                | 0.58                  |                                      |
| 412                                 | Sandy Cove      | Temperate North Pacific   | USA     | 2001               | 2003             | <1ha          | -3.82                                           | 2001                | 0.70                  | [57]                                 |
|                                     |                 |                           |         |                    |                  |               |                                                 | 2002                | 0.68                  |                                      |
|                                     |                 |                           |         |                    |                  |               |                                                 | 2003                | 0.65                  |                                      |
| 413                                 | Pirates Cove    | Temperate North Pacific   | USA     | 2001               | 2003             | <1ha          | 4.90                                            | 2001                | 0.18                  | [57]                                 |
|                                     |                 |                           |         |                    |                  |               |                                                 | 2002                | 0.20                  |                                      |

| Site reference number<br>(database) | Site name           | Global seagrass bioregion | Country      | Year study started | Year study ended | Area category | Specific rate of change, $\mu$<br>(% $y^{-1}$ ) | Year of data record | Area recorded<br>(Ha) | Data source<br>(publication number*) |
|-------------------------------------|---------------------|---------------------------|--------------|--------------------|------------------|---------------|-------------------------------------------------|---------------------|-----------------------|--------------------------------------|
|                                     |                     |                           |              |                    |                  |               |                                                 | 2003                | 0.20                  |                                      |
| <b>414</b>                          | Kromme Estuary      | Temperate Southern Oceans | South Africa | 1942               | 1989             | <10ha         | 5.01                                            | 1942                | 1.16                  | [58]                                 |
|                                     |                     |                           |              |                    |                  |               |                                                 | 1961                | 6.02                  |                                      |
|                                     |                     |                           |              |                    |                  |               |                                                 | 1975                | 6.08                  |                                      |
|                                     |                     |                           |              |                    |                  |               |                                                 | 1979                | 6.13                  |                                      |
|                                     |                     |                           |              |                    |                  |               |                                                 | 1985                | 9.92                  |                                      |
|                                     |                     |                           |              |                    |                  |               |                                                 | 1986                | 9.78                  |                                      |
|                                     |                     |                           |              |                    |                  |               |                                                 | 1988                | 11.65                 |                                      |
|                                     |                     |                           |              |                    |                  |               |                                                 | 1989                | 12.20                 |                                      |
| <b>415</b>                          | Canal de Ovar       | Temperate North Atlantic  | Portugal     | 1984               | 2003             | <1000ha       | -23.06                                          | 1984                | 800                   | [59]                                 |
|                                     |                     |                           |              |                    |                  |               |                                                 | 2003                | 10                    |                                      |
| <b>416</b>                          | Mosquito Lagoon     | Tropical Atlantic         | USA          | 1970               | 1992             | >1000ha       | 0.94                                            | 1970                | 5496.80               | [60]                                 |
|                                     |                     |                           |              |                    |                  |               |                                                 | 1986                | 5023.80               |                                      |
|                                     |                     |                           |              |                    |                  |               |                                                 | 1992                | 6758.10               |                                      |
| <b>417</b>                          | Banana River        | Tropical Atlantic         | USA          | 1970               | 1992             | >1000ha       | -0.18                                           | 1970                | 9052.20               | [60]                                 |
|                                     |                     |                           |              |                    |                  |               |                                                 | 1986                | 6729.30               |                                      |
|                                     |                     |                           |              |                    |                  |               |                                                 | 1992                | 8691.20               |                                      |
| <b>418</b>                          | Indian River Lagoon | Tropical Atlantic         | USA          | 1970               | 1992             | >1000ha       | -1.30                                           | 1970                | 17226.90              | [60]                                 |
|                                     |                     |                           |              |                    |                  |               |                                                 | 1986                | 21905.10              |                                      |
|                                     |                     |                           |              |                    |                  |               |                                                 | 1992                | 12935.30              |                                      |
| <b>419</b>                          | Barnegat Bay        | Temperate North Atlantic  | USA          | 1968               | 1999             | >1000ha       | -0.37                                           | 1968                | 6825                  | [61]                                 |
|                                     |                     |                           |              |                    |                  |               |                                                 | 1979                | 8053                  |                                      |
|                                     |                     |                           |              |                    |                  |               |                                                 | 1987                | 8799                  |                                      |
|                                     |                     |                           |              |                    |                  |               |                                                 | 1999                | 6083                  |                                      |
| <b>420</b>                          | Port Hacking        | Temperate Southern Oceans | Australia    | 1950               | 2000             | <1000ha       | -1.61                                           | 1951.1035           | 183.46                | [62]                                 |

| Site reference number<br>(database) | Site name                        | Global seagrass bioregion | Country             | Year study started | Year study ended | Area category | Specific rate of change, $\mu$<br>(% $y^{-1}$ ) | Year of data record | Area recorded<br>(Ha) | Data source<br>(publication number*) |
|-------------------------------------|----------------------------------|---------------------------|---------------------|--------------------|------------------|---------------|-------------------------------------------------|---------------------|-----------------------|--------------------------------------|
|                                     |                                  |                           |                     |                    |                  |               |                                                 | 1961.0279           | 140.73                |                                      |
|                                     |                                  |                           |                     |                    |                  |               |                                                 | 1976.8587           | 72.79                 |                                      |
|                                     |                                  |                           |                     |                    |                  |               |                                                 | 1984.9471           | 99.50                 |                                      |
|                                     |                                  |                           |                     |                    |                  |               |                                                 | 1999.0406           | 81.85                 |                                      |
| 421                                 | Bahia San Quintin                | Temperate North Pacific   | Mexico              | 1987               | 2000             | >1000ha       | -1.11                                           | 1987                | 2390                  | [63]                                 |
|                                     |                                  |                           |                     |                    |                  |               |                                                 | 2000                | 2069                  |                                      |
| 422                                 | Back Sound & southern Core Sound | Temperate North Atlantic  | USA                 | 1985               | 1988             | >1000ha       | -1.92                                           | 1985                | 7030                  | [64]                                 |
|                                     |                                  |                           |                     |                    |                  |               |                                                 | 1988                | 6637                  |                                      |
| 423                                 | South Sound, Grand Cayman        | Tropical Atlantic         | British West Indies | 1971               | 1992             | <1000ha       | 1.75                                            | 1971                | 121.36                | [65]                                 |
|                                     |                                  |                           |                     |                    |                  |               |                                                 | 1992                | 175.36                |                                      |
| 435                                 | Turnbull Creek                   | Tropical Atlantic         | USA                 | 1943               | 2003             | <100ha        | -1.19                                           | 1943                | 117.16                | [66]                                 |
|                                     |                                  |                           |                     |                    |                  |               |                                                 | 1965                | 151.45                |                                      |
|                                     |                                  |                           |                     |                    |                  |               |                                                 | 1974                | 116.35                |                                      |
|                                     |                                  |                           |                     |                    |                  |               |                                                 | 1986                | 59.82                 |                                      |
|                                     |                                  |                           |                     |                    |                  |               |                                                 | 1989                | 124.17                |                                      |
|                                     |                                  |                           |                     |                    |                  |               |                                                 | 1992                | 91.66                 |                                      |
|                                     |                                  |                           |                     |                    |                  |               |                                                 | 1993                |                       |                                      |
|                                     |                                  |                           |                     |                    |                  |               |                                                 | 1994                | 125.36                |                                      |
|                                     |                                  |                           |                     |                    |                  |               |                                                 | 1995                |                       |                                      |
|                                     |                                  |                           |                     |                    |                  |               |                                                 | 1996                | 92.32                 |                                      |
|                                     |                                  |                           |                     |                    |                  |               |                                                 | 1997                |                       |                                      |
|                                     |                                  |                           |                     |                    |                  |               |                                                 | 1998                |                       |                                      |
|                                     |                                  |                           |                     |                    |                  |               |                                                 | 1999                | 33.76                 |                                      |
|                                     |                                  |                           |                     |                    |                  |               |                                                 | 2000                |                       |                                      |
|                                     |                                  |                           |                     |                    |                  |               |                                                 | 2001                |                       |                                      |
|                                     |                                  |                           |                     |                    |                  |               |                                                 | 2002                |                       |                                      |
|                                     |                                  |                           |                     |                    |                  |               |                                                 | 2003                | 57.28                 |                                      |
| 437                                 | Western Port Bay                 | Temperate Southern        | Australia           | 1973               | 1999             | >1000ha       | -2.14                                           | 1973                | 23000                 | [67]                                 |



| Site reference number<br>(database) | Site name                     | Global seagrass bioregion | Country   | Year study started | Year study ended | Area category | Specific rate of change, $\mu$<br>(% $y^{-1}$ ) | Year of data record  | Area recorded<br>(Ha) | Data source<br>(publication number*) |
|-------------------------------------|-------------------------------|---------------------------|-----------|--------------------|------------------|---------------|-------------------------------------------------|----------------------|-----------------------|--------------------------------------|
|                                     |                               | Oceans                    |           |                    |                  |               |                                                 | 1984<br>1994<br>1999 | 5900<br>9300<br>13200 |                                      |
| 438                                 | Port Phillip Bay-Kirk Pt      | Temperate Southern Oceans | Australia | 2000               | 2005             | <100ha        | 12.07                                           | 2000<br>2005         | 16.30<br>29.80        | [68]                                 |
| 439                                 | Port Phillip Bay-Pt Richards  | Temperate Southern Oceans | Australia | 2000               | 2005             | <100ha        | -23.16                                          | 2000<br>2005         | 83.40<br>26.20        | [68]                                 |
| 440                                 | Port Phillip Bay-Blairgowrie  | Temperate Southern Oceans | Australia | 2000               | 2005             | <10ha         | -25.50                                          | 2000<br>2005         | 5.94<br>1.66          | [68]                                 |
| 441                                 | Western Port-Rhyll            | Temperate Southern Oceans | Australia | 1999               | 2005             | <100ha        | 0.21                                            | 1999<br>2005         | 16<br>16.20           | [68]                                 |
| 442                                 | Western Port-Scrub Point      | Temperate Southern Oceans | Australia | 1999               | 2005             | <1000ha       | 0.06                                            | 1999<br>2005         | 108.10<br>108.50      | [68]                                 |
| 443                                 | Corner Inlet - Lewis Channel  | Temperate Southern Oceans | Australia | 1998               | 2005             | <1000ha       | -3.88                                           | 1998<br>2005         | 194.10<br>147.90      | [68]                                 |
| 444                                 | Corner Inlet - Duck Point     | Temperate Southern Oceans | Australia | 1998               | 2005             | <1000ha       | -0.15                                           | 1998<br>2005         | 136<br>134.60         | [68]                                 |
| 445                                 | Corner Inlet - Granite Island | Temperate Southern Oceans | Australia | 1998               | 2005             | <1000ha       | 0.21                                            | 1998                 | 240.60                | [68]                                 |

| Site reference number<br>(database) | Site name           | Global seagrass bioregion | Country           | Year study started | Year study ended | Area category | Specific rate of change, $\mu$<br>(% $y^{-1}$ ) | Year of data record | Area recorded (Ha) | Data source (publication number*) |
|-------------------------------------|---------------------|---------------------------|-------------------|--------------------|------------------|---------------|-------------------------------------------------|---------------------|--------------------|-----------------------------------|
|                                     |                     |                           |                   |                    |                  |               |                                                 | 2005                | 244.10             |                                   |
| 446                                 | Portinho da Rabida  | Temperate North Atlantic  | Portugal          | 1983               | 2005             | <100ha        | -38.71                                          | 1983                | 30                 | [69]                              |
|                                     |                     |                           |                   |                    |                  |               |                                                 | 2005                | 0.01               |                                   |
| 483                                 | Buck Channel Island | Tropical Atlantic         | US Virgin Islands | 1971               | 1999             | <1000ha       | 4.22                                            | 1971                | 133                | [70]                              |
|                                     |                     |                           |                   |                    |                  |               |                                                 | 1999                | 434                |                                   |

\* *Data sources*

1. Orth, RJ, Luckenbach, ML, Marion, SR, Moore, KA, and Wilcox, DJ, 2006. Seagrass recovery in the Delmarva Coastal Bays, USA. *Aquatic Botany*. **84**:26-36.
2. Tomasko, DA, Corbett, CA, Greening, HS, and Raulerson, GE, 2005. Spatial and temporal variation in seagrass coverage in Southwest Florida: assessing the relative effects of anthropogenic nutrient load reductions and rainfall in four contiguous estuaries. *Marine Pollution Bulletin*. **50**:797-805.
3. Sanchez-Camacho, M (2003) Study of the spatio-temporal changes in the distribution of the seagrass *Posidonia oceanica* in Mallorca (Balearic Islands, Spain) between 1956 and 2001 by remote sensing and GIS methods. MSc Thesis, University of Wales, Cardiff, United Kingdom.
4. Neckles, HA, Short, FT, Barker, S, and Kopp, BS, 2005. Disturbance of eelgrass *Zostera marina* by commercial mussel *Mytilus edulis* harvesting in Maine: dragging impacts and habitat recovery. *Marine Ecology-Progress Series*. **285**:57-73.
5. Frederiksen, M, Krause-Jensen, D, Holmer, M, and Laursen, JS, 2004. Long-term changes in area distribution of eelgrass (*Zostera marina*) in Danish coastal waters. *Aquatic Botany*. **78**:167-181.
6. de Jonge, VN, de Jong, DJ, and van Katwijk, MM, 2000. Policy plans and management measures to restore eelgrass (*Zostera marina* L.) in the Dutch Wadden Sea. *Helgoland Marine Research*. **54**:151-158.
7. Baden, S, Gullstrom, M, Lunden, B, Pihl, L, and Rosenberg, R, 2003. Vanishing seagrass (*Zostera marina*, L.) in Swedish coastal waters. *Ambio*. **32**:374-377.
8. Johansson, JOR and Lewis III, RR, Recent improvements of water quality and biological indicators in Hillsborough Bay, a highly impacted subdivision of Tampa Bay, Florida, USA, in *Marine Coastal Eutrophication*, Vollenweider, RA, Marchetti, R, and Viviani, R, Editors. 1992, Elsevier: London, United Kingdom. p. 1199-1215.
9. Charpentier, A, Grillas, P, Lescuyer, F, Coulet, E, and Auby, I, 2005. Spatio-temporal dynamics of a *Zostera noltii* dominated community over a period of fluctuating salinity in a shallow lagoon, Southern France. *Estuarine Coastal And Shelf Science*. **64**:307-315.

10. Cardoso, PG, Brandao, A, Pardal, MA, Raffaelli, D, and Marques, JC, 2005. Resilience of *Hydrobia ulvae* populations to anthropogenic and natural disturbances. *Marine Ecology-Progress Series*. **289**:191-199.
11. Cunha, AH, Santos, RP, Gaspar, AP, and Bairros, MF, 2005. Seagrass landscape-scale changes in response to disturbance created by the dynamics of barrier-islands: A case study from Ria Formosa (Southern Portugal). *Estuarine Coastal And Shelf Science*. **64**:636-644.
12. Campbell, SJ and McKenzie, LJ, 2004. Flood related loss and recovery of intertidal seagrass meadows in southern Queensland, Australia. *Estuarine Coastal And Shelf Science*. **60**:477-490.
13. Pergent-Martini, C, Pasqualini, V, Pergent, G, and Ferrat, L, 2002. Effect of a newly set up wastewater-treatment plant on a marine phanerogam seagrass bed - A medium-term monitoring program. *Bulletin Of Marine Science*. **71**:1227-1236.
14. Kendrick, GA, Aylward, MJ, Hegge, BJ, Cambridge, ML, Hillman, K, Wyllie, A, and Lord, DA, 2002. Changes in seagrass coverage in Cockburn Sound, Western Australia between 1967 and 1999. *Aquatic Botany*. **73**:75-87.
15. Ruiz, JM, Perez, M, and Romero, J, 2001. Effects of fish farm loadings on seagrass (*Posidonia oceanica*) distribution, growth and photosynthesis. *Marine Pollution Bulletin*. **42**:749-760.
16. Kendrick, GA, Benthic habitat mapping Owen Anchorage. 2004, Oceanica Consulting Pty Ltd and Cooperative Research Centre for Coastal Zone Estuary and Waterways Management, Brisbane, Australia.
17. Seddon, S, Connolly, RM, and Edyvane, KS, 2000. Large-scale seagrass dieback in northern Spencer Gulf, South Australia. *Aquatic Botany*. **66**:297-310.
18. Chauvelon, P, 1998. A wetland managed for agriculture as an interface between the Rhône river and the Vaccarès lagoon (Camargue, France): transfers of water and nutrients. *Hydrobiologia*. **374**:181-191.
19. Ward, DH, Markon, CJ, and Douglas, DC, 1997. Distribution and stability of eelgrass beds at Izembek Lagoon, Alaska. *Aquatic Botany*. **58**:229-240.
20. Kennedy, AD, 1997. Biological complexity confounds the separation of point- and non-point sources of human impact on the natural world. *Environmental Monitoring And Assessment*. **48**:173-192.
21. Fernandez, C, Pasqualini, V, Boudouresque, CF, Johnson, M, Ferrat, L, Caltagirone, A, and Mouillot, D, 2006. Effect of an exceptional rainfall event on the sea urchin (*Paracentrotus lividus*) stock and seagrass distribution in a Mediterranean coastal lagoon. *Estuarine Coastal And Shelf Science*. **68**:259-270.
22. Larkum, AWD and West, RJ, 1990. Long-term changes of seagrass meadows in Botany Bay, Australia. *Aquatic Botany*. **37**:55-70.
23. Glemarec, M, LeFaou, Y, and Cuq, F, 1997. Long-term changes of seagrass beds in the Glenan Archipelago (South Brittany). *Oceanologica Acta*. **20**:217-227.
24. Boudouresque CF, et al. (2006) Préservation et conservation des herbiers á *Posidonia oceanica*. (Ramoge Commission, Monaco) pp. 197
25. Hannah, J (2008) Coastal Sedimentation: What We Know and the Information Gaps (Environment Waikato Regional Council, Hamilton East, New Zealand)
26. Dekker, AG, Brando, VE, and Anstee, JM, 2005. Retrospective seagrass change detection in a shallow coastal tidal Australian lake. *Remote Sensing of the Environment*. **97**:415-433.

27. Hegge, BJ and Kendrick, GA, Changes in the distribution of vegetated habitats (seagrasses and reefs) in Esperance Bay between 1956 and 2001, in *The Marine Flora and Fauna of Esperance, Western Australia*, Wells, FE, Walker, DI, and Kendrick, GA, Editors. 2005, Western Australia Museum: Perth. p. 108-122.
28. Bridgwood, S (2006) Seagrass landscapes along a wave gradient. PhD Thesis, Murdoch University, Perth, Western Australia.
29. Hillman, K, McComb, AJ, and Walker, DI, 1995. The distribution, biomass and primary production of the seagrass *Halophila ovalis* in the Swan-Canning estuary, Western Australia. *Aquatic Botany*. **51**:1-54.
30. Brearley, A, Ernest Hodgkin's Swanland: Estuaries and Coastal Lagoons of South-Western Australia. 2005, UWA Press, Perth, The University of Western Australia. 550 pp.
31. Short, FT and Burdick, DM, 1996. Quantifying eelgrass habitat loss in relation to housing development and nitrogen loading in Waquoit Bay, Massachusetts. *Estuaries*. **19**:730-739.
32. Short, FT and Short, CA, Seagrasses of the western North Atlantic, in *World Atlas of Seagrasses*, Green, EP and Short, FT, Editors. 2003, Univ. of California Press: Berkeley. p. 207-215.
33. Aioi, K and Nakaoka, M, The seagrasses of Japan, in *World Atlas of Seagrasses*, Green, EP and Short, FT, Editors. 2003, University of California Press: Berkeley, CA. p. 185-192.
34. Dowty, P, Puget Sound Submerged Vegetation Monitoring Project 2003-2004 Monitoring Report. . 2005, Nearshore Habitat Program, Aquatic Resources Division, Washington State Dept. of Natural Resources, : Olympia, WA. 68 pp. + appendices.
35. Steward, JS, Virnstein, RW, Lasi, MA, Morris, LJ, Miller, JD, Hall, LM, and Tweedale, WA, 2006. The impacts of the 2004 hurricanes on hydrology, water quality, and seagrass in the central Indian River Lagoon, Florida. *Estuaries and Coasts*. **29**:954-965.
36. Murdoch, T, *et al.*, (2007) Large scale decline of offshore seagrass meadows in Bermuda. *Marine Ecology-Progress Series*. **339**:123-130
37. Quammen, ML and Onuf, CP, 1993. Laguna Madre: Seagrass changes continue decades after salinity reduction. *Estuaries*. **16**:302-310.
38. Roessler, MA and Zieman, JC, 1970. The effects of thermal additions on the biota of Biscayne Bay, Florida. *Proceedings of the Gulf and Caribbean Fisheries Institute*. **22**:136-145.
39. Orth RJ *et al.* (2007) 2006 Distribution of submerged aquatic vegetation in Chesapeake and Coastal Bays: Special Scientific Report #150. (Virginia Institute of Marine Science, College of William and Mary, Gloucester Point, VA, USA)
40. The Massachusetts Department of Environmental Protection (2006) Eelgrass map. Available at <http://www.mass.gov/dep/water/resources/maps/eelgrass/eelgrass.htm>.
41. U.S. Geological Survey (2004) Seagrass habitat in the northern Gulf of Mexico: Degradation, conservation and restoration of a valuable resource. U.S. Geological Survey Report No 855-R-04-001. (Gulf of Mexico Program Office, USGS, Stennis Space Center, MS, USA)
42. Restrepo, JD, Zapata, P, Diaz, JM, Garzon-Ferreira, J, and Garcia, CB, 2006. Fluvial fluxes into the Caribbean Sea and their impact on coastal ecosystems: The Magdalena River, Columbia. *Global and Planetary Change*. **50**:33-49.

43. Hastings, K, Hesp, P, and Kendrick, GA, 1995. Seagrass loss associated with boat moorings at Rottneest Island, Western Australia. *Ocean & Coastal Management*. **26**:225-246.
44. Philippart, CJM and Dijkema, KS, 1995. Wax and wane of *Zostera noltii* Hornem. in the Dutch Wadden Sea. *Aquatic Botany*. **49**:255-268.
45. Meehan, AJ and West, RJ, Seagrasses in southern NSW estuaries - their ecology, conservation, restoration and management. Rep. no. 2002/1. 2002, Ocean and Coastal Research Centre (OCRC), University of Wollongong, Australia. : Wollongong, Australia.
46. Meehan, AJ (1997) Historical changes to the seagrass, mangrove and saltmarsh communities of Merimbula and Pambula Lake. Wollongong University, Honours Thesis.
47. Bostrom, C, Baden, SP, and Krause-Jensen, D, The seagrasses of Scandinavia and the Baltic Sea, in *World Atlas of Seagrasses*, Green, EP and Short, FT, Editors. 2003, University of California Press: Berkeley, USA. p. 27-37.
48. Hily, C, van Katwijk, MM, and den Hartog, C, Seagrasses of Western Europe, in *World Atlas of Seagrasses* Green, EP and Short, FT, Editors. 2003, University of California Press: Berkeley. p. 38-47.
49. Procaccini, G, Buia, MC, Gambi, MC, Perez, M, Pergent, G, Pergent-Martini, C, and Romero, J, The seagrasses of the western Mediterranean, in *World Atlas of Seagrasses*, Green, EP and Short, FT, Editors. 2003, University of California Press: Berkeley. p. 48-58.
50. Coles, R, McKenzie, L, and Campbell, S, The seagrasses of Eastern Australia, in *World Atlas of Seagrasses*, Green, EP and Short, FT, Editors. 2003, University of California Press: Berkeley. p. 119-133.
51. Inglis, GJ, The seagrasses of New Zealand, in *World Atlas of Seagrasses*, Green, EP and Short, FT, Editors. 2003, University of California Press: Berkeley. p. 134-143.
52. Lee, K-S and Lee, SY, The seagrasses of the Republic of Korea, in *World Atlas of Seagrasses*, Green, EP and Short, FT, Editors. 2003, University of California Press: Berkeley. p. 193-198.
53. Onuf, C, Phillips, R, Moncreiff, C, Raz-Guzman, A, and Herrera-Silveira, J, The seagrasses of the Gulf of Mexico, in *World Atlas of Seagrasses*, Green, EP and Short, FT, Editors. 2003, University of California Press: Berkeley. p. 224-233.
54. Corbett, CA, 2006. Seagrass coverage changes in Charlotte Harbor, Fl. *Florida Scientist*. **69**:7-23.
55. Pulich, WM and White, WA, 1991. Decline of submerged vegetation in the Galveston Bay System: Chronology and relationships to physical processes. *Journal of Coastal Research*. **7**:1125-1138.
56. Adair, SE, Moore, JL, and Onuf, CP, 1994. Distribution and status of submerged vegetation in estuaries of the upper Texas coast. *Wetlands*. **14**:110-121.
57. Johnson, SW and Thedinga, JF, 2005. Fish use and size of eelgrass meadows in southeastern Alaska: a baseline for long-term assessment of biotic change. *Northwest Science*. **79**:141-155.
58. Adams, J and Talbot, M, 1992. The influence of river impoundment on the estuarine seagrass *Zostera capensis* Setchell. *Botanica Marina*. **35**:69-75.
59. da Silva, JF, Duck, RW, and Catarino, JB, 2004. Seagrasses and sediment response to changing physical forcing in a coastal lagoon. *Hydrology and Earth System Sciences*. **8**:151-159.

60. Fletcher, SW and Fletcher, WW, 1995. Factors affecting changes in seagrass distribution and diversity patterns in the Indian River Lagoon complex between 1940 and 1992. *Bulletin Of Marine Science*. **57**:49-58.
61. Lathrop, RG, Styles, RM, Seitzinger, SP, and Bognar, JA, 2001. Use of GIS mapping and modeling approaches to examine the spatial distribution of seagrasses in Barnegat Bay, New Jersey. *Estuaries*. **24**:904-916.
62. Meehan, AJ, Williams, RJ, and Watford, FA, 2005. Detecting trends in seagrass abundance using aerial photograph interpretation: Problems arising with the evolution of mapping methods. *Estuaries*. **28**:462-472.
63. Ward, DH, Morton, A, Tibbitts, TL, Douglas, DC, and Carrera-Gonzalez, E, 2003. Long-term change in eelgrass distribution at Bahía San Quintín, Baja California, Mexico, using satellite imagery. *Estuaries*. **26**:1529-1539.
64. Ferguson, RL, Wood, LL, and Graham, DB, 1993. Monitoring spatial change in seagrass habitat with aerial photography. *Photogrammetric Engineering & Remote Sensing*. **59**:1033-1038.
65. Beanish, J, Sanchez-Azofeifa, A, and Jones, B, 2002. Application of image analysis for mapping of sedimentary facies in a shallow lagoon: case study, south sound, Grand Cayman, British West Indies. *International Journal of Remote Sensing*. **23**:2877-2890.
66. Morris, LJ and Virnstein, RW, 2004. The demise and recovery of seagrass in the Northern Indian River Lagoon, Florida. *Estuaries*. **27**:915-922.
67. Blake, S and Ball, D, Victorian marine habitat database: seagrass mapping of Western Port. 2001, Geospatial Systems Section, Marine and Freshwater Resources Institute: Queenscliff, Australia.
68. Ball, D, Parry, G, Heislors, S, Blake, S, and Werner, G, Analysis of Victorian seagrass health at a multi-regional level: progress report 1. 2006, Primary Industries Research Victoria: Queenscliff, Australia.
69. BIOMARES, Restoration and management of biodiversity in the Marine Park Site Arrábida-Espichel. 2006, CCMAR: Faro, Portugal.
70. Kendall, MS, Battista, T, and Hillis-Starr, Z, 2004. Long term expansion of a deep *Syringodium filiforme* meadow in St. Croix, US Virgin Islands: the potential role of hurricanes in the dispersal of seeds. *Aquatic Botany*. **78**:15-25.
