# Supplementary material
Source: PubMed Central journal article supplement (PMC2718374)
Supplement: 0905620106_ST2_PDF.pdf [file 0905620106_ST2_PDF.pdf]

Table S2.

| <i>Data categories</i>         | $\mu$ median<br>(% rate change<br>per year) | N<br>( $\mu$ median) | $\mu$ mean<br>(% rate change<br>per year) | N<br>( $\mu$<br>average) | $\mu$ s.e.<br>(standard error<br>on mean) | net area<br>(Ha) | Average<br>length of<br>study (years) |
|--------------------------------|---------------------------------------------|----------------------|-------------------------------------------|--------------------------|-------------------------------------------|------------------|---------------------------------------|
| <b>Overall</b>                 |                                             |                      |                                           |                          |                                           |                  |                                       |
| <1930                          | -0.76                                       | 2                    | -0.76                                     | 2                        | 0.14                                      | -14730           | 82.5                                  |
| 1930-1940                      | 2.50                                        | 11                   | 2.26                                      | 11                       | 1.07                                      | -14165           | 27.9                                  |
| 1940-1950                      | -0.42                                       | 27                   | 0.09                                      | 27                       | 1.11                                      | -15916           | 27.7                                  |
| 1950-1960                      | -0.42                                       | 59                   | 1.36                                      | 58                       | 1.12                                      | -28566           | 22.1                                  |
| 1960-1970                      | -0.79                                       | 92                   | -1.64                                     | 89                       | 0.99                                      | -25955           | 17.7                                  |
| 1970-1980                      | -0.84                                       | 140                  | -2.90                                     | 129                      | 1.10                                      | -42532           | 15.8                                  |
| 1980-1990                      | -0.32                                       | 236                  | -0.02                                     | 223                      | 1.06                                      | -333863          | 11.4                                  |
| 1990-2000                      | -0.29                                       | 275                  | -1.26                                     | 265                      | 1.92                                      | -319670          | 8.6                                   |
| <b>Decreasing</b>              |                                             |                      |                                           |                          |                                           |                  |                                       |
| <1930 decreasing               | -0.76                                       | 2                    | -0.76                                     | 2                        | 0.14                                      | -14730           | 82.5                                  |
| 1930-1940 decreasing           | -0.89                                       | 3                    | -1.80                                     | 3                        | 1.04                                      | -14880           | 20.0                                  |
| 1940-1950 decreasing           | -1.82                                       | 13                   | -3.83                                     | 13                       | 1.31                                      | -16667           | 28.3                                  |
| 1950-1960 decreasing           | -1.82                                       | 28                   | -3.40                                     | 27                       | 0.80                                      | -34280           | 27.3                                  |
| 1960-1970 decreasing           | -3.03                                       | 49                   | -5.85                                     | 46                       | 1.51                                      | -47575           | 20.5                                  |
| 1970-1980 decreasing           | -4.46                                       | 69                   | -7.75                                     | 65                       | 1.96                                      | -66348           | 17.0                                  |
| 1980-1990 decreasing           | -5.53                                       | 98                   | -9.23                                     | 94                       | 1.12                                      | -371465          | 14.7                                  |
| 1990-2000 decreasing           | -7.67                                       | 115                  | -15.90                                    | 109                      | 3.43                                      | -348830          | 9.5                                   |
| <b>Increasing</b>              |                                             |                      |                                           |                          |                                           |                  |                                       |
| <1930 increasing               | no records                                  |                      |                                           |                          |                                           |                  |                                       |
| 1930-1940 increasing           | 4.49                                        | 7                    | 4.35                                      | 7                        | 0.91                                      | 721              | 15.8                                  |
| 1940-1950 increasing           | 4.49                                        | 11                   | 4.89                                      | 11                       | 1.14                                      | 786              | 15.4                                  |
| 1950-1960 increasing           | 4.82                                        | 20                   | 8.57                                      | 20                       | 2.29                                      | 4923             | 11.7                                  |
| 1960-1970 increasing           | 4.26                                        | 21                   | 5.98                                      | 21                       | 1.38                                      | 20880            | 10.4                                  |
| 1970-1980 increasing           | 4.34                                        | 37                   | 4.76                                      | 30                       | 0.69                                      | 23039            | 14.2                                  |
| 1980-1990 increasing           | 6.38                                        | 75                   | 12.42                                     | 66                       | 2.48                                      | 35749            | 8.8                                   |
| 1990-2000 increasing           | 8.45                                        | 72                   | 19.07                                     | 68                       | 3.83                                      | 28823            | 7.9                                   |
| <b>No detectable change</b>    |                                             |                      |                                           |                          |                                           |                  |                                       |
| <1930 no detectable change     | no records                                  |                      |                                           |                          |                                           |                  |                                       |
| 1930-1940 no detectable change | -0.13                                       | 1                    | -0.13                                     | 1                        | -                                         | -6               | 41.6                                  |

| <i>Data categories</i>                | $\mu$ median<br>(% rate change<br>per year) | N<br>( $\mu$ median) | $\mu$ mean<br>(% rate change<br>per year) | N<br>( $\mu$<br>average) | $\mu$ s.e.<br>(standard error<br>on mean) | net area<br>(Ha) | Average<br>length of<br>study (years) |
|---------------------------------------|---------------------------------------------|----------------------|-------------------------------------------|--------------------------|-------------------------------------------|------------------|---------------------------------------|
| <i>1940-1950 no detectable change</i> | -0.13                                       | 3                    | -0.50                                     | 3                        | 0.37                                      | -35              | 35.3                                  |
| <i>1950-1960 no detectable change</i> | 0.06                                        | 11                   | -0.06                                     | 11                       | 0.17                                      | 791              | 23.9                                  |
| <i>1960-1970 no detectable change</i> | -0.06                                       | 22                   | -0.12                                     | 22                       | 0.11                                      | 740              | 17.8                                  |
| <i>1970-1980 no detectable change</i> | -0.10                                       | 34                   | -0.38                                     | 34                       | 0.19                                      | 777              | 15.6                                  |
| <i>1980-1990 no detectable change</i> | 0.03                                        | 63                   | 0.67                                      | 63                       | 0.30                                      | 1853             | 10.9                                  |
| <i>1990-2000 no detectable change</i> | 0.07                                        | 88                   | 1.15                                      | 88                       | 0.28                                      | 337              | 8.4                                   |
